1 **Adaptive spectroscopic visible-light optical coherence tomography for**  
2 **human retinal oximetry**

3

4 Ian Rubinoff,<sup>1</sup> Roman V. Kuranov,<sup>1,2</sup> Zeinab Ghassabi,<sup>3</sup> Yuanbo Wang,<sup>2</sup> Lisa Beckmann,<sup>1</sup> David A. Miller,<sup>1</sup>

5 Behnam Tayebi,<sup>3</sup> Gadi Wollstein,<sup>3</sup> Hiroshi Ishikawa,<sup>3</sup> Joel S. Schuman,<sup>3</sup> Hao F. Zhang<sup>1</sup>

6

7 <sup>1</sup>: Department of Biomedical Engineering, Northwestern University, Evanston IL 60208

8 <sup>2</sup>: Opticent Health, Evanston IL 60201

9 <sup>3</sup>: Department of Ophthalmology, New York University, New York NY 10017

10

11

12 **Abstract**

13 Alterations in the retinal oxygen saturation ( $sO_2$ ) and oxygen consumption are associated  
14 with nearly all blinding diseases. A technology that can accurately measure retinal  $sO_2$  has  
15 the potential to improve ophthalmology care significantly. Recently, visible-light optical  
16 coherence tomography (vis-OCT) showed great promise for noninvasive, depth-resolved  
17 measurement of retinal  $sO_2$  as well as ultra-high resolution anatomical imaging. We  
18 discovered that spectral contaminants (SC), if not correctly removed, could lead to  
19 incorrect vis-OCT  $sO_2$  measurements. There are two main types of SCs associated with  
20 vis-OCT systems and eye conditions, respectively. Their negative influence on  $sO_2$   
21 accuracy is amplified in human eyes due to stringent laser power requirements, eye motions,  
22 and varying eye anatomies. We developed an adaptive spectroscopic vis-OCT (Ads-vis-  
23 OCT) method to iteratively remove both types of SCs. We validated Ads-vis-OCT in *ex*  
24 *vivo* bovine blood samples against a blood-gas analyzer. We further validated Ads-vis-  
25 OCT in 125 unique retinal vessels from 18 healthy subjects against pulse-oximeter readings,  
26 setting the stage for clinical adoption of vis-OCT.

27

## 28 **Introduction**

29 Visual processing is one of the most oxygen-demanding functions in the human body (1,  
30 2). Diseases such as diabetic retinopathy and glaucoma can compromise visual processing  
31 in the retina, leading to irreversible vision loss (2, 3). In response to pathological damages,  
32 the retina regulates oxygen supply and extraction to satisfy new metabolic demands (2-8).  
33 Therefore, change in oxygen saturation ( $sO_2$ ) has been broadly agreed to be a sensitive  
34 biomarker for various retinal diseases and may be evident before irreversible vision loss  
35 occurs (9, 10). Clinical measurement of  $sO_2$  shall open a critical window for timely  
36 intervention to prevent, slow down, or even reverse disease progressions in patients.  
37 However, no existing technology has satisfied the clinical need to measure human retinal  
38  $sO_2$  noninvasively, accurately, and reproducibly.

39 Optical coherence tomography (OCT), commonly operating within the near-  
40 infrared (NIR) spectral range between 800 nm and 1300 nm, enabled noninvasive retinal  
41 imaging at a spatial resolution of a few micrometers (11-13). It has become the “Gold  
42 standard” for examining structural damages or therapeutic recoveries in nearly all vision-  
43 threatening diseases. However, the low spectroscopic optical contrast in blood within the  
44 NIR spectral range confounded OCT’s  $sO_2$  measurements (14-16).

45 The recently developed visible-light OCT (vis-OCT) (5, 17-22) has shown great  
46 promise in overcoming the contrast limit since visible light is highly sensitive to the optical  
47 absorption and scattering spectral signatures of blood (14, 23). Vis-OCT analyzes the  
48 improved optical spectral contrasts in the blood to measure  $sO_2$  using short-time Fourier  
49 transforms (STFTs) and inverse least-squares fit regression (17). Operating between 510  
50 nm – 610 nm, vis-OCT can provide 1.4- $\mu$ m full-bandwidth axial resolution (24) and 9- $\mu$ m  
51 STFT axial resolution in the retina. Therefore, vis-OCT can specifically isolate the  
52 attenuation spectrum of blood inside individual retinal vessels. This capability provides  
53 significant advantages in accuracy over fundus-photography-based retinal oximetry (25),  
54 which is not depth-resolved and failed to isolate the attenuation spectrum of blood.

55 However, reported vis-OCT oximetry techniques (17, 22, 26) are unsatisfactory,  
56 especially in human imaging, which hampered its clinical impact. More specifically,  
57 current vis-OCT oximetry failed to remove key spectral contaminants (SC), which we  
58 found to impact  $sO_2$  accuracy significantly. Here, we define SC as any erroneous spectra

59 not associated with blood attenuation. We classify SCs into two categories: sample-  
60 dependent and system-dependent. When SCs are not correctly accounted for, they  
61 contribute to errors in the STFT spectrum and lead to incorrect  $sO_2$  measurement after  
62 inverse least-squares fit.

63 Fig. 1 is an illustration of the human retina and sources of sample-dependent SCs.  
64 The spectral signatures of vis-OCT signals contain contributions from three groups of  
65 detected photons: specularly-reflected photons (highlighted by group 1), backscattered  
66 photons without interacting with blood (highlighted by group 2), and backscattered photons  
67 with interaction with blood (highlighted by group 3). Since the vis-OCT signal is depth-  
68 resolved, photon interactions with tissue beneath a blood vessel do not add additional SC.  
69 However, photon interactions with tissues above a vessel, such as inner limiting membrane  
70 (ILM), retinal nerve fiber layer (RNFL), or vessel wall and red blood cell (RBC), add SC  
71 to  $sO_2$  measurements. To accurately measure  $sO_2$ , vis-OCT needs to separate depth-  
72 resolved optical absorption and scattering spectral signatures of the blood from SCs  
73 contributed by these three groups of photons.

74 System-dependent SCs come from the optical illumination, detection, and  
75 processing of the vis-OCT signal. We identified three key system-dependent SCs:  
76 spectrally-dependent roll-off (SDR), spectrally-dependent background bias (SDBG), and  
77 longitudinal chromatic aberration (LCA). Recently, we showed how SDR (27) and SDBG  
78 (28) contaminate spectroscopic measurements of *ex vivo* blood samples and *in vivo* humans,  
79 respectively, in vis-OCT. LCA (illustrated by the axial displacements of green, yellow, and  
80 red wavelengths in the scanning beam in Fig. 1) has also been considered a contaminant  
81 for structural and spectroscopic OCT (29-31). Please also refer to **Supplementary**  
82 **Materials – Accounting for LCA**.

83 Previously, researchers analyzed vis-OCT backscattered signals from a vessel's  
84 posterior wall (PW) to measure  $sO_2$  in rodents (17, 22) without correcting the SCs  
85 mentioned above. The fundamental limitation of a purely backscattering measurement is  
86 that it does not directly measure the attenuation coefficient of blood and is therefore  
87 susceptible to SCs. This method also was unable to measure  $sO_2$  from large vessels where  
88 the PW was undetectable due to strong blood attenuation.

89 Both the sample-dependent and system-dependent SCs have magnified and more  
90 unpredictable influences on sO<sub>2</sub> measurement accuracy in human imaging than in small  
91 animal imaging because of the reduced light illumination power due to ocular laser safety  
92 and patient comfort, stronger eye motion, and larger variation in retinal anatomy (18, 19,  
93 26, 32). In addition, it is more challenging to identify PWs of all human retinal vessels due  
94 to enlarged vessel diameters. Therefore, clinical vis-OCT oximetry requires that sO<sub>2</sub>  
95 measurements be free from SCs without identifying PWs of vessels.

96 In this work, we developed an adaptive spectroscopic vis-OCT, or Ads-vis-OCT,  
97 to isolate blood's spectral signature without needing to identify vessels' PWs. We validated  
98 Ads-vis-OCT's accuracy in *ex vivo* samples made from bovine blood at 17 oxygenation  
99 levels (see **Supplementary – Ex vivo phantom verification and comparison**). We tested  
100 Ads-vis-OCT's repeatability in 125 unique vessels from 18 human volunteers imaged in a  
101 clinical environment. In our human tests, vis-OCT-measured retinal artery sO<sub>2</sub> values  
102 agreed with the corresponding pulse oximeter readings. Most importantly, our sO<sub>2</sub> results  
103 required no calibration to account for any systemic bias, suggesting an SC-insensitive sO<sub>2</sub>  
104 measurement.

105

## 106 **Results**

107

### 108 **Adaptive Spectroscopic vis-OCT**

109 Fig. 2 shows the flow-chart for Ads-vis-OCT, containing 12 steps on how they flow from  
110 one to the other. Figures before and after each step depict their respective inputs and outputs.  
111 In **Step 1**, we computed the STFT of each full-band interference fringe to obtain 21  
112 spectrally-dependent A-lines (SDA-lines) (see **Methods – Short-time Fourier**  
113 **Transform**). The input is the interference fringes divided into 21 sub-bands, where the  
114 colors highlight the center wavelengths ( $\lambda$ ) in the visible-light spectrum. The outputs are  
115 the SDA-lines, which encode depth (z-dimension) and wavelength sub-bands ( $\lambda$ -  
116 dimension). The SDA-lines experience axial displacement among the 21 sub-bands  
117 (highlighted by colored arrows) due to imperfect correction of dispersion mismatch and  
118 LCA (33). The SDA-lines also experience a bias from the SDBG (highlighted by black-  
119 dashed box).

120 In **Step 2**, we axially registered the SDA-lines for all B-scans. We also removed  
121 the SDBG bias in the SDA-lines (34). Strategy for registration and SDBG removal are  
122 described in **Methods – SDA-line Registration** and **SDBG Removal**.

123 In **Step 3**, we identified the depth at which signal decay from the blood begins ( $z_d$ )  
124 in each SDA-line (see **Methods – Normalization Model for Spectroscopic vis-OCT**). As  
125 the **Step 3** output, the spectrum at  $z_d$  is highlighted by the black dashed line, and the  
126 approximately exponential blood decay is highlighted by the red dashed line.

127 In **Step 4**, we normalized the SDA-lines by the spectrum at  $z_d$  and computed their  
128 natural logarithm, making the original exponential decay almost linear (see **Methods –**  
129 **Normalization Model for Spectroscopic vis-OCT**). In the **Step 4** output, the black dashed  
130 line highlights the spectrum at  $z_d$ , which is constant across  $\lambda$  after normalization. The red-  
131 dashed line highlights the approximately linear decay of the vis-OCT blood signal after  
132 taking the natural logarithm.

133 In **Step 5**, we removed outlier B-scans using coarse data filtering (see **Methods –**  
134 **Coarse Data Filtering**). After removing the outliers, we averaged the remaining B-scans  
135 to reduce noise, yielding a single set of natural logarithm SDA-lines (NL-SDA-lines).

136 In **Step 6**, we selected the depths for spectroscopic measurement in the NL-SDA-  
137 lines. The **Step 6** outputs are the starting depth ( $z_0$ ) and depth range ( $\Delta z$ ) for the  
138 measurement. The blue box highlights the measurement range for selected depths and  
139 spectral sub-bands. We averaged NL-SDA-lines in the blue box along the z-axis, yielding  
140 a 1D STFT spectrum (see **Methods – Depth Averaging**).

141 In **Step 7**, we assessed how the STFT spectrum changed along with the depth of  
142 the vessel (see **Methods – Depth Selection**). Briefly, we calculated a 1D STFT spectrum  
143 at different depths by iterating through different  $z_0$  and  $\Delta z$  values. For each depth, we  
144 applied nine perturbations to  $z_0$  and  $\Delta z$ . Then, we calculated changes in the measured  
145 spectrum after the perturbations. The **Step 7** output is the spectral-stability matrix (SSM),  
146 which plots the shape change (error) after perturbations in  $z_0$  and  $\Delta z$ . We selected the  
147 optimal pair of  $z_0$  and  $\Delta z$  with the smallest error (highlighted by green box).

148 In **Step 8**, we averaged the NL-SDA-lines within the depth range defined by the  
149 optimal  $z_0$  and  $\Delta z$  and fit the depth-averaged STFT spectrum to a linear combination of  
150 oxygenated and deoxygenated blood attenuation spectra (see **Methods – Oximetry Fitting**

151 **Model**). The **Step 8** output is the spectroscopic fit, in which a least-squares regression fits  
152 a predicted STFT spectrum (black dashed line) to the measured STFT spectrum (blue line).

153 In **Step 9**, we estimated the sO<sub>2</sub> value by calculating the proportion of the  
154 oxygenated blood in the fit. We also calculated the corresponding coefficient of regression  
155 R<sup>2</sup>.

156 In **Step 10**, we adapted to experimental and physiological variables in each vessel  
157 by iterating through **Steps 2-9** for small variations in three parameters. These parameters  
158 include scattering scaling factor  $W$ , the start of attenuation depth  $z_d$ , and amplitude scaling  
159 factor  $S$  in removing SDBG. The outputs of **Step 10** are two three-dimensional (3D)  
160 matrixes that store the measured sO<sub>2</sub> and R<sup>2</sup>, respectively, corresponding to each parameter  
161 iteration (see **Methods – Parameter Iterations**).

162 In **Step 11**, we applied fine data filtering (see **Methods – Fine Data Filtering**),  
163 where we created a histogram of the sO<sub>2</sub> values. In **Step 12**, selected a central value from  
164 the histogram. The selected sO<sub>2</sub> value and its corresponding R<sup>2</sup> and  $W$  values were the final  
165 outputs.

## 166 **Spectroscopic normalization in retinal blood vessels**

167 To extract blood attenuation from vis-OCT signals, we need to remove the sample-  
168 dependent SC influences from tissues with depths above the blood as the vis-OCT light  
169 propagates (group 1 and group 2 photons highlighted in Fig. 1). Normalization of the blood  
170 STFT spectrum by the tissue STFT spectrum at a selected depth can potentially remove  
171 sample-dependent SC influences. We tested four normalization methods and compared  
172 their corresponding STFT spectra. Fig. 3a is a representative vis-OCT B-scan image  
173 acquired 1.7-mm superonasal to the optic disc from a 37-year-old female volunteer. We  
174 selected one vein (V1) and one artery (V2) with diameters of 168 μm and 120 μm,  
175 respectively. The four normalization methods are Method 1: no normalization, as reported  
176 by Yi et al. (17), Chen et al. (25), and Pi et al. (22); Method 2: normalization by the RNFL,  
177 which is typically anterior to the retinal vessels, as reported by Song et al. (26) and

178 suggested by Chong et al. (19, 20); Method 3: normalization by the anterior vessel wall  
179 (AW), which can be highly reflective and is immediately above the blood signal; and  
180 Method 4: normalization by the start of signal decay in the blood ( $z_d$ ). We applied SDBG  
181 correction (28) for all four methods. In Figs. 3b-3i, we plot the measured STFT spectrum  
182 for each normalization against the spectrum predicted by least-squares regression (see **Step**  
183 **8** of Fig. 2). For all methods, we plot the regression's best fit with respect to normalization  
184 method 4, since it is the only one consistent with our theoretical model (see **Methods –**  
185 **Normalization Model for Spectroscopic vis-OCT**), experimental verification (see  
186 **Supplementary--Ex vivo phantom verification and comparison**), and fitting quality  
187 threshold (see **Methods – Fine Data Filtering**). If all the normalization methods were  
188 equivalent, each measured STFT spectrum would converge to this best-fit spectrum. Below,  
189 we show this is not the case.

190 In Figs. 3b-3e, we plot the measured STFT spectra (blue lines) in V1 against best-  
191 fit spectrum (dashed line) for  $sO_2 = 56.5\%$  and scattering scaling factor (17)  $W = 0.05$ . To  
192 standardize the plots, all measured and best-fit spectra are plotted after normalization  
193 between 0 and 1. Using Method 1 (Fig. 3b), the measured STFT spectrum overestimates  
194 the best-fit spectrum at longer wavelengths and underestimates it at shorter wavelengths.  
195 Using Method 2 (Fig. 3c), the measured STFT spectrum follows a similar trend but is not  
196 identical to that using Method 1. Using Method 3 (Fig. 3d), amplitudes of the measured  
197 STFT spectrum agree well with the best-fit spectrum for wavelengths longer than 540 nm,  
198 while they are comparatively lower for wavelengths shorter than 540 nm. Using Method 4  
199 (Fig. 3e), the measured STFT spectrum agrees well with the best-fit spectrum for all  
200 wavelengths ( $R^2 = 0.99$ ). In addition to removing many of the SC described in Fig. 1,  
201 Method 4 is the only one removing influence from the backscattering coefficient of blood.  
202 The other three normalization methods each generated measurements that are different  
203 from the best-fit result, which means that these methods still suffer from SCs.



204 Figs. 3f-3i plot spectra measured in V2 alongside the best-fit spectrum for  $sO_2 =$   
205 99.6% and  $W = 0.09$ . Using Method 1 (Fig. 3f), the measured spectrum overestimates the  
206 best-fit spectrum for longer wavelengths and underestimates it for shorter wavelengths,  
207 similar to that in Fig. 3b. In Method 2, since there was no visible RNFL tissue above V2,  
208 we normalized by the RNFL tissue directly to the right of the vessel (highlighted by an  
209 arrow in Fig. 3a). Using Method 2 (Fig. 3g), the measured spectrum agrees with the best-  
210 fit at wavelengths longer than 540 nm but disagrees at wavelengths shorter than 540 nm,  
211 similar to the trend seen in Fig. 3d. Using Method 3, (Fig. 3h), the measured spectrum  
212 overestimates at longer wavelengths and underestimates at shorter wavelengths. Method 4  
213 (Fig. 3i) generated an STFT spectrum agreeing with the best-fit ( $R^2 > 0.99$ ) at all  
214 wavelengths, indicating successfully removing SCs.

215 Fig. 3 suggests that careful normalization is critical for accurately and repeatably  
216 extracting the oxygen-dependent attenuation spectrum of blood in the retina. Method 4 is  
217 facilitated by direct measurement of blood attenuation from the blood signal. This  
218 highlights a critical flaw in identifying PW (17), which indirectly measures blood  
219 attenuation from PW backscattering and assumes that it is independent of SCs. We  
220 confirmed that normalization Method 4 is the best to remove SCs in other tested vessels,  
221 as shown in Fig. S3a in **Supplementary Materials**.

## 222 **Accounting for depth-dependent spectra within retinal vessels**

223 The Beer-Lambert model (17, 35) assumes that the spectrum of blood is depth-independent.  
224 In reality, we observed changes in the measured STFT spectrum with depth in human  
225 retinal vessels, which may be attributed to scattering changes with the vessel depth from  
226 the distributions of blood cells (36, 37). Therefore, we developed a spectral stability  
227 analysis in **Step 7** (Fig. 1), as detailed in **Methods – Depth Selection**. The goal of spectral  
228 stability analysis is to select a depth region in a blood vessel where the measured spectrum  
229 is mostly depth-independent.

230 Fig. 4a shows the SSM for V1 from Fig. 3a (see **Methods – Depth Selection**). The  
231 SSM plots how much the measured STFT spectrum changes with depth as a function of  
232 the selected starting depth  $z_0$  and depth range  $\Delta z$ . A lower mean-squared error (MSE)  
233 indicates that the measured STFT spectrum has less depth variation. The green box in Fig.  
234 4a highlights the pair of  $z_0$  and  $\Delta z$  where MSE is the lowest, and the black box highlights

235 where it is highest. We plot the measured STFT spectra corresponding to the black and  
236 green boxes in Fig. 4a in **Supplementary Materials** (Fig. S7a). In V1, the spectrum is  
237 most depth-stable for longest  $\Delta z$  and least depth-stable for shortest  $\Delta z$ . Optimal depths  
238 varied across the veins investigated in this study. The average selected  $\Delta z$  for veins ( $n =$   
239  $53$ ) was  $33 \mu\text{m}$  out of a maximum value of  $40 \mu\text{m}$ . Selected  $\Delta z$  ranged from  $\Delta z = 22 \mu\text{m}$   
240 to  $\Delta z = 40 \mu\text{m}$ .

241 Fig. 4c shows the SSM for V2 from Fig. 3a. Unlike Fig. 4a, the lowest MSE (green  
242 box) is actually at a shorter depth than the highest MSE (black box). Arteries are generally  
243 pulsatile and have higher flow velocity than veins, perhaps introducing different SC with  
244 the vessel depth. Nevertheless, we show that by selecting the  $z_0$  and  $\Delta z$  with the lowest  
245 MSE, we selected a depth-stable spectrum. We plot the measured STFT spectra  
246 corresponding to the black and green boxes in Fig. 4b in **Supplementary Materials** (Fig.  
247 S7b). Similar to veins, the most and the least stable depth varied across arteries in this study.  
248 The average selected  $\Delta z$  in arteries ( $n = 72$ ) was  $33 \mu\text{m}$  out of a maximum of  $40 \mu\text{m}$  and  
249 selected  $\Delta z$  ranged from  $\Delta z = 17 \mu\text{m}$  to  $\Delta z = 40 \mu\text{m}$ . We analyzed the spectral stability for  
250 other selected vessels in the **Supplementary Materials**.

251

## 252 **Retinal oximetry around the optic disk**

253 The network of vessels supporting oxygen delivery to the inner retina is derived from the  
254 optic disk. Therefore, an oximetry map of the optic disk can help to investigate oxygen  
255 delivery or extraction in the entire retina. We achieved an oximetry map of the optic disk  
256 with a single 10-s vis-OCT scan. Fig. 5a illustrates a representative oximetry map of the  
257 optic disk with a  $4.8 \times 4.8 \text{ mm}^2$  FOV in a 23-year-old volunteer without known ocular  
258 diseases. We measured  $s\text{O}_2$  in 17 vessels (10 arteries and 7 veins) ranging from  $37 \mu\text{m}$  to  
259  $168 \mu\text{m}$  in diameter.

260 We pseudo-colored the 17 vessels according to their measured  $s\text{O}_2$  values onto a  
261 vis-OCT fundus image (Fig. 5a) and plotted the  $s\text{O}_2$  values in the bar chart (Fig. 5b). The  
262 measured  $s\text{O}_2$  across all arteries was  $95.8 \pm 4.4\%$  ( $n = 10$ ) and the measured  $s\text{O}_2$  across major  
263 arteries (diameter  $\geq 100 \mu\text{m}$ ) was  $97.3 \pm 2.8\%$  ( $n = 6$ ). The average pulse oximeter  
264 measurement from the index finger was 98%, which agrees well with the vis-OCT

265 measured sO<sub>2</sub> from the major arteries. The measured sO<sub>2</sub> across all veins was 59.0±3.2%,  
266 and the mean sO<sub>2</sub> between major arteries and veins (A-V difference) was 38.3%.

267 Fig. 5c shows a B-scan from the location highlighted by the dashed yellow line in  
268 Fig. 5a. We can observe a small artery (vessel 4, diameter = 37 μm) directly above a major  
269 artery (vessel 3, diameter = 122 μm). The measured sO<sub>2</sub> value in vessel 3 is 98.3%,  
270 consistent with pulse oximeter reading (98%), and the measured sO<sub>2</sub> value in vessel 4 is  
271 85.8%. We were able to measure sO<sub>2</sub> values from both vessels (Fig. 5a), demonstrating the  
272 unique depth-resolved sO<sub>2</sub> imaging capability permitted by vis-OCT. Such axially  
273 overlapping vessel anatomy further emphasizes the need for AdS-vis-OCT since the  
274 oxygen-dependent spectrum from vessel 4 will contaminate the measured blood spectrum  
275 from vessel 3 if not correctly normalized. Our AdS-vis-OCT measured sO<sub>2</sub> in both vessels,  
276 independent of one another. The posterior wall of vessel 4 appears to be in direct contact  
277 with the anterior wall of vessel 3. We hypothesize that the lower measured sO<sub>2</sub> in vessel 4  
278 is partially caused by oxygen diffusion to the contacting vessel or surrounding RNFL.

279

## 280 **Retinal oximetry in a healthy cohort**

281 We performed vis-OCT retinal oximetry in 18 volunteers without known health issues in  
282 clinics. We measured sO<sub>2</sub> in 125 unique vessels (72 arteries and 53 veins) within a 3.4 mm  
283 radius of the optic nerve head.

284 Fig. 6a shows sO<sub>2</sub> from unique arteries (red) and veins (blue) plotted as a function  
285 of vessel diameter. Arterial sO<sub>2</sub> values show a decreasing trend with decreasing vessel  
286 diameter. We determined that vessels diameter was a statistically significant factor (see  
287 **Methods – Statistical Analysis**) in this trend ( $p = 4.35 \times 10^{-6}$ ). The diameter-dependent  
288 trend is consistent with oxygen gradients observed in other precapillary arteries (38-44).  
289 Since smaller vessels generally offered fewer pixels in vis-OCT images to average and  
290 therefore were potentially more sensitive to noise, we investigated whether the sO<sub>2</sub>  
291 decrease was an artifact of lower spectral fit R<sup>2</sup>. We determined that R<sup>2</sup> was not a  
292 statistically significant factor (see **Methods – Statistical Analysis**) in this trend ( $p =$   
293 0.701). Venous sO<sub>2</sub> slightly increases with decreasing vessel diameter, but the trend is not

294 statistically significant ( $p = 0.232$ ). Spectral fit  $R^2$  is also not significant ( $p = 0.070$ ) in  
295 determining  $sO_2$  in veins.

296 To account for the observed  $sO_2$  gradient with diameter, we computed average  $sO_2$   
297 in arteries across two diameter groups (diameter  $\geq 100 \mu\text{m}$  and diameter  $< 100 \mu\text{m}$ ). Fig.  
298 6b shows  $sO_2$  measurements for major arteries (diameter  $\geq 100 \mu\text{m}$ ), small arteries  
299 (diameter  $< 100 \mu\text{m}$ ), and veins with all diameters. Major arteries ( $n = 36$ ) had  $sO_2 = 97.9$   
300  $\pm 2.9\%$ . Small arteries ( $n = 36$ ) had  $sO_2 = 93.2 \pm 5.0\%$ . The difference in  $sO_2$  between the  
301 two groups was statistically significant ( $p = 4.01 \times 10^{-6}$ , two-sample T-test). Average  
302 spectral fits were  $R^2 = 0.96, 0.93$ , and  $0.95$  for major arteries, small arteries, and all veins,  
303 respectively. An average  $R^2$  of  $0.93$  or higher validates the efficacy of Ads-vis-OCT in a  
304 wide range of retinal vessel diameters in humans.

305 We acquired repeated scans of 42 unique vessels and calculated their average SDs  
306 (24 unique arteries and 18 unique veins across 12 volunteers). Fig. 6c shows average SDs  
307 for arteries (red) and veins (blue). All arteries and veins had average SDs of  $2.21\%$  and  
308  $2.32\%$ , respectively. We noted above that smaller vessels endured less volumetric  
309 averaging than larger vessels. Therefore, we investigated repeatability for arteries and veins  
310 of diameters larger and smaller than  $100 \mu\text{m}$ . Larger arteries ( $n = 17$ ) and smaller arteries  
311 ( $n = 7$ ) had average SDs of  $2.08\%$  and  $2.52\%$ , respectively. Larger veins ( $n = 15$ ) and  
312 smaller veins ( $n = 3$ ) had average SDs of  $2.29\%$  and  $2.43\%$  respectively. There was no  
313 statistically significant difference between the average repeatability values for any of the  
314 groups (two-sample T-test). Finally, we investigated repeatability for best spectral fits ( $R^2$   
315  $\geq 0.95$ ) and relatively lower spectral fits ( $R^2 < 0.95$ ). Best fit arteries ( $n = 17$ ) and lower  
316 fit arteries ( $n = 7$ ) had average SDs of  $1.66\%$  and  $3.54\%$ , respectively. Best fit veins ( $n =$   
317  $11$ ) and lower fit veins ( $n = 7$ ) had average standard deviations of  $2.41\%$  and  $2.16\%$ ,  
318 respectively. The difference between the average SDs for the artery groups was statistically  
319 significant ( $p = 0.02$ ). However, one analyzed artery with  $R^2 < 0.95$  was an outlier (SD =  
320  $6.83\%$ ). After removing the outlier, the average SD for  $R^2 < 0.95$  was  $2.99\%$ , and the  
321 difference between the best fit and lower fit groups would no longer be statistically  
322 significant ( $p = 0.09$ ). Cumulative results for arteries and veins suggest high repeatability  
323 in the data acquired in the clinical setting. Statistics for each unique vessel in repeatability  
324 analysis shown in Table S1 (see **Supplementary Materials**).

325 We estimated the ground-truth retinal  $sO_2$  in major arteries (diameter  $\geq 100$   $\mu\text{m}$ )  
326 using the  $sO_2$  measured from a pulse oximeter. Table 1 compares measured  $sO_2$  from the  
327 pulse oximeter and vis-OCT for unique major arteries (diameter  $\geq 100$   $\mu\text{m}$ ) from 12  
328 volunteers, where a pulse oximeter concurrently measured  $sO_2$  at their index fingers. We  
329 measured the root-mean-squared-error (RMSE) between pulse oximeter  $sO_2$  and vis-OCT  
330  $sO_2$  for each unique artery in each respective subject (Table 1, Column 5). The last row in  
331 Table 1 shows average results across all 12 subjects. Average major artery was  $sO_2 = 98.3\%$ ,  
332 in close agreement with that by the pulse oximeter ( $sO_2 = 98.6\%$ ). The average RMSE  
333 between vis-OCT and the pulse oximeter was 2.04%. Such accuracy is consistent with *ex*  
334 *vivo* vis-OCT  $sO_2$  measurements (Fig. S2a in **Supplementary Materials**). We also noted  
335 that the SD for major arteries was 2.08% (Fig. 6c), which matches the average RMSE. This  
336 observation suggests that vis-OCT measured  $sO_2$  may be within noise-limited agreement  
337 with the pulse oximeter. We emphasize that vis-OCT  $sO_2$  measurements agreed with the  
338 pulse oximeter without any post-hoc calibrations (25, 45).

339

#### 340 **Comparison of depth-averaging and slope methods**

341 The depth-resolved slope of NL-SDA-lines (further referred to as the “slope method”) was  
342 previously used to extract the attenuation coefficient of OCT signals in **Step 8** in Fig. 2 (19,  
343 29, 35). In this work, we found that the depth-resolved average of NL-SDA-lines (further  
344 referred to as “depth-averaging method”) was superior to the slope method for retinal  
345 oximetry. We compared the two methods for  $sO_2$  measurements in the 125 unique human  
346 retinal vessels described above. Both  $sO_2$  measurements used identical AdS-vis-OCT  
347 processing with identical depth-selection windows. To implement the slope method, only  
348 the depth-averaging step, as depicted by Step 8 in the AS-OCT processing, was replaced  
349 with a simple linear regression to estimate the slopes of NL-SDA-lines (output of Step 6)  
350 along the  $z$ -axis.

351 Table 2 compares the  $sO_2$  measurement statistics for 125 unique human retinal  
352 vessels (72 arteries and 53 veins) for the depth-averaging and slope methods. Success rate  
353 indicates the fraction of  $sO_2$  measurements that surpassed our quality control threshold,  
354 including a spectral fit  $R^2 > 0.80$  or  $R^2 > 0.93$  if  $sO_2 = 100\%$ . For this analysis, we combine  
355  $sO_2$  across all diameters.

356 For all unique arteries, the depth-averaging method had a success rate of 100 %,  
357 while the slope method had a success rate of 64 %. For depth-averaging, all arteries had an  
358 average sO<sub>2</sub> of 95.1 ± 5.1 %, while the slope method yielded an average of 90.4 ± 8.92 %.  
359 The SD of the slope method was 75% higher than that of the averaging method. The lower  
360 average spectral fit R<sup>2</sup> for the slope method (0.92), as compared with the depth-averaged  
361 method (0.95), is consistent with its higher SD. Additionally, we anticipated that the R<sup>2</sup>  
362 was still inflated for the slope method since we rejected 36% of vessels based on a low R<sup>2</sup>.

363 For all unique veins, the depth-averaging method had a success rate of 100%, while  
364 the slope method had a success rate of 66%. For depth-averaging, veins had an average sO<sub>2</sub>  
365 of 58.5 ± 4.3 %, while the slope method had an average of 56.8 ± 10.71 %. SD of the  
366 slope method was 149% higher than that of the depth-averaging method. Similar to arteries,  
367 the slope method had a lower average R<sup>2</sup> (0.92), as compared with the depth-averaging  
368 method (0.94). Since we rejected 34 % based on low R<sup>2</sup>, we anticipate that the venous R<sup>2</sup>  
369 for the slope method was still inflated.

370 The comparisons between the two methods demonstrate that the depth-averaging  
371 method greatly improves the stability of vis-OCT retinal oximetry than the slope method.  
372 We investigated the improved stability using Monte-Carlo simulation in the  
373 **Supplementary Materials**.

374

## 375 **Discussion**

376 Clinical application is the ultimate goal for vis-OCT oximetry, which SC currently hinders.  
377 In this work, we developed depth-resolved Ads-vis-OCT processing to remove SCs from  
378 sO<sub>2</sub> measurements. We also introduced a depth-averaging method to measure attenuation  
379 spectra that significantly improved stability for sO<sub>2</sub> measurements *in vivo*.

380 Using Ads-vis-OCT, we found excellent agreement with reported spectra *ex vivo*  
381 and *in vivo* (Fig. S2). In the human retina, sO<sub>2</sub> measurements across all unique arteries and  
382 veins were highly repeatable (average SD = 2.21% and 2.31%, respectively). Furthermore,  
383 the average error between major artery sO<sub>2</sub> and a pulse oximeter (RMSE = 2.08 %) was  
384 similar to the average SD of major artery sO<sub>2</sub> after repeated measurements (SD = 2.04 %),  
385 suggesting that the accuracy was limited by noise and not a systemic bias. Across 72 unique  
386 arteries from 18 subjects, we found a statistically significant trend between decreased

387 diameter and decreased sO<sub>2</sub>. This trend is consistent with previously observed precapillary  
388 oxygen gradients (38-44).

389 Previous vis-OCT retinal oximetry relied on backscattered signal from the vessel  
390 PW to measure sO<sub>2</sub>. The PW method is an indirect measurement of blood's attenuation  
391 spectrum and does not consider SCs other than the PW itself. Contamination by the PW is  
392 fit to a power-law decay ( $B\lambda^{-\alpha}$ ) by the first Born approximation (17), where  $B$  and  $\alpha$  are  
393 positive constants representing microstructural scattering properties of the tissue. As  
394 previously recognized (45), and illustrated by the measured STFT spectra in Fig. 3, such  
395 an sO<sub>2</sub> model is likely overly simplified, especially in the human retina. First, most vessels  
396 are buried under several layers of retinal tissues with varying optical properties (14, 19, 32,  
397 46, 47). Interfaces at the ILM and vessel wall are composed of highly reflective and fibrous  
398 tissues that may not necessarily conform to power-law approximation. For example,  
399 consider vessel V1 in Fig. 3. The ILM/RNFL interface appears transparent at some parts  
400 of the retina but is bright directly above the blood vessel. Since the brightness is most  
401 intense when the interface is orthogonal to the vis-OCT illumination beam, we hypothesize  
402 that it may come from specular reflection or high backscattering from the fibrous tissues.  
403 A similar trend is valid at the anterior wall (AW) interface for V1. While the majority of  
404 the vessel wall has similar intensity to the RNFL, the center of the AW exhibits a higher  
405 reflectance. We believe this is either specular reflection or perhaps backscattering from the  
406 fibrous vessel lamina (47). Such light-tissue interactions can have spectral profiles  
407 dependent on the incident angle of light, as well as local optical properties such as  
408 polarization (48, 49). As another example, the ILM in Fig. S5 (see **Supplementary**  
409 **Materials**) shows higher amplitudes for shorter wavelengths (green) than longer  
410 wavelengths (orange), but the reverse trend at the vessel wall, which is not consistent with  
411 the power-law decay model. In general, the non-blood tissues examined in our study did  
412 not exhibit reliably identical structural or spectral features to apply such a simplified decay  
413 model. We hypothesize previous uses of the power-law model may have partially fit other  
414 SCs.

415 Song et. al previously attempted to remove some SCs using the PW method by  
416 normalizing the measured STFT spectrum by signal backscattered from the RNFL (26). As  
417 seen in Eqns. 1-7, normalizing by tissues other than the blood itself results in contaminating

418 terms that do not isolate the attenuation spectrum of blood. This is supported by Fig. 3,  
419 where we show that normalizing by different tissues results in different measured spectra.  
420 By directly measuring blood attenuation and normalizing at  $z_d$ , we show analytically (Eqns.  
421 1-7), *ex vivo* (**Supplementary Fig. S2**), and *in vivo* (Fig. 3) that most SCs can be removed,  
422 thereby providing consistent and accurate measurements. Direct blood measurement also  
423 enables sO<sub>2</sub> measurements in large and small vessels independent of visibility of the PW.

424 Vis-OCT measures a scattering coefficient of blood lower than that predicted by  
425 Mie theory (23). Here, we represent its reduction by multiplication with the coefficient  $W$ .  
426 However, the value of  $W$  in vis-OCT and the reasoning for its existence are still not well  
427 agreed upon and varies greatly depending on the studies (17, 20, 29, 50). Several vis-OCT  
428 works used  $W = 0.2$ , which is based on a model dependent on hematocrit (17). To our  
429 knowledge, this value was derived *in vivo* in rat retinas without removal of SCs we  
430 identified in this work. Following the appropriate normalizations in a well-controlled *ex*  
431 *vivo* phantom experiment (**Supplementary Fig. S2**), we found strong fits between  $W =$   
432  $0.02$  and  $W = 0.10$ , nearly 10-fold smaller than the reported  $W = 0.2$ . The average best-fit  
433  $W$  in the phantom experiment was  $0.068$  at physiological hematocrit (45%) (Fig. S2a).  
434 Since our normalization protocol explicitly isolated the scattering and absorption  
435 coefficients of blood, we anticipated that spectral measurements in the human retina should  
436 be highly similar to those *ex vivo* (neglecting any spectral differences between human and  
437 bovine blood). We measured the average best-fit  $W$  in the human retina as  $0.064$  (Fig. S2c),  
438 nearly identical to that found in the *ex vivo* experiment ( $0.068$ ). Even though the two  
439 experimental conditions and sample media were very different, we reached nearly identical  
440 quantitative conclusions. We believe that the prior conclusion of  $W = 0.2$  was the result  
441 of incomplete normalization of the blood spectrum since a higher  $W$  value results in  
442 spectral shapes similar to those shown without normalization in Fig. 3 (17). To this end,  
443 the higher  $W$  may potentially fit SCs from the vis-OCT system or tissue, but not the true  
444 attenuation coefficient of blood. Misinterpreting SCs for blood attenuation can result in  
445 overfitting of oxygen-dependent parameters, inflating spectral fit  $R^2$ , and leading to  
446 overconfident or inaccurate measurements.

447 Recent vis-OCT measurements of oxygenated hemoglobin by Veenstra et al. (29)  
448 recognized many of the system-dependent spectra depicted here. They found that the



449 average scattering coefficient of blood was significantly reduced to  $\sim 100 \text{ cm}^{-1}$ , equivalent  
450 to  $W = 0.03$  and within our observed  $W$  range. We note that they did not consider oxygen-  
451 dependent scattering by the Kramers-Kronig relationship (23), which our work does. As  
452 Veenstra et al. noted, the reduced scattering contribution is likely caused by the high  
453 forward scattering of erythrocytes. Such forward scattering increases the likelihood that  
454 multiply scattered photons are collected within the illumination beam's solid angle. Since  
455 the multiply scattered photons will reach deeper than singly scattered photons, the  
456 perceived scattering coefficient in the blood is reduced.

457 Vis-OCT signal amplitudes in the blood are scaled by the backscattering spectra of  
458 erythrocytes (51) (Eqs. 1&2 in **Methods**). A previous study developed a theoretical model  
459 for erythrocyte backscattering (52) in the visible-light spectral range, although it did not  
460 find strong agreement with experimental measurements. In this work, we directly measured  
461 and normalized the influence of blood's backscattering spectrum, which is distinct from its  
462 attenuation spectrum.

463 Additionally, the reduced axial resolution of spectroscopic vis-OCT analysis may  
464 prevent delineation of the backscattered blood signal from other tissues in small vessels  
465 and capillaries. Recent work by Pi *et al.* (22) reported an STFT central wavelength of 555  
466 nm with a bandwidth of 9 nm. Assuming a refractive index of 1.35, this provides an *in vivo*  
467 STFT axial resolution of  $\sim 11 \mu\text{m}$ . Although this work segmented vessels using the full-  
468 band axial resolution of vis-OCT (reported  $1.2 \mu\text{m}$ ), their spectroscopic measurements  
469 were limited to the STFT axial resolution. It would be challenging to differentiate  
470 contaminating tissue or blood backscattering signals from blood attenuation signals,  
471 considering that capillary diameters are comparable to or even smaller than the STFT axial  
472 resolution. However, their model for capillary-scale  $\text{sO}_2$  measurement was based on the  
473 previously published PW method, which, in addition to not addressing the resolution  
474 problem, did not consider SCs for accurate measurement of optical properties of blood.  
475 When vessels become sufficiently small (e.g., diameters  $< 20 \mu\text{m}$ ) such that there is  
476 insufficient depth or depth resolution to isolate attenuation contrast, the blood  
477 backscattering spectra, rather than attenuation spectra, may be key for accurate  $\text{sO}_2$   
478 measurements, as previously suggested by Liu *et al.* (50).

479 In summary, we leveraged the high-resolution, depth-resolved advantages of vis-  
480 OCT towards the isolation of spectral signatures from light-blood interactions. We  
481 developed and tested Ads-vis-OCT for retinal oximetry in 18 healthy subjects in vessels  
482 ranging from 37  $\mu\text{m}$  to 176  $\mu\text{m}$  in diameter in a clinical environment. We found excellent  
483 spectral fits, repeatability, and agreements with the pulse oximeter readings. AdS-vis-OCT  
484 sets the stage for clinical vis-OCT retinal oximetry.

485

## 486 **Methods**

### 487 **Short-time Fourier transform**

488 To extract a depth-resolved spectrum, we multiplied 21 Gaussian windows with the  
489 spectral interferogram. Windows were of equal wavenumber ( $k$ ) full-width at half  
490 maximum (FWHM) and spaced equidistantly in the  $k$  space from 528 to 588 nm. Window  
491 FWHM was 11 nm at 558 nm, reducing the axial resolution to  $\sim 9 \mu\text{m}$  in the retina  
492 (assuming a refractive index of 1.35). We computed the STFT for the Gaussian windows  
493 to generate SDA-lines.

494

### 495 **Normalization model for spectroscopic vis-OCT**

496 To accurately quantify  $\text{sO}_2$ , the oxygen-dependent attenuation spectrum of blood must be  
497 correctly isolated from sample-dependent and system-dependent SCs. We developed a  
498 model of the SDA-line to include alterations induced by the SC on the attenuation spectrum  
499 of blood. Eq. 1 describes the SDA-line for a homogenous medium

$$500 \quad I(\lambda, z) = F(\lambda, z) 2\sqrt{I_{\text{samp}}(\lambda)I_{\text{ref}}(\lambda)}\sqrt{A(\lambda, z)T(\lambda, z_s)\mu_b(\lambda)}e^{-\mu_t(\lambda)(z-z_s)} + B(\lambda, z), (1)$$

501 where  $\lambda$  is the wavelength;  $z$  is the depth coordinate;  $z_s$  is the surface of the medium with  
502 respect to the zero-delay depth  $z=0$ ;  $\sqrt{I_{\text{samp}}(\lambda)}$  and  $\sqrt{I_{\text{ref}}(\lambda)}$  are the power spectra of the  
503 light collected from the sample and reference arms, respectively. System-dependent SC  
504 spectra include the SDR  $F(\lambda, z)$  (27), the LCA transfer function  $A(\lambda, z)$ , and the SDBG  
505  $B(\lambda, z)$  Sample-related SC spectra include the backscattering coefficient of the medium  
506  $\mu_b(\lambda)$ , the attenuation coefficient of the medium  $\mu_t(\lambda)$ , and the double-pass transmission  
507 coefficient across the top interface of the medium  $T(\lambda, z_s)$ .

508 The retina-specific model for the SDA-line must consider multi-layered media with  
 509 different optical properties. After normalizing the source power spectrum and subtracting  
 510 the SDBG, we write the SDA-line at the boundary ( $z_d$ ), where signal decay begins as

$$511 \quad I(\lambda, z_d) = F(\lambda, z_d) 2 \sqrt{A(\lambda, z_d) \mu_{blood}(\lambda) \prod_{i=1}^{n-1} [\sqrt{T(\lambda, z_i)} e^{-\mu_{t_i}(\lambda)(z_{i+1}-z_i)}]} \text{ for } z = z_d, \quad (2)$$

512  
 513 where  $i$  is the tissue layer and blood is the  $n^{th}$  tissue layer. Furthermore, we write the  
 514 residual SDA-line below  $z_d$  as

$$515 \quad I(\lambda, z) = I'(\lambda, z_n) \frac{F(\lambda, z) \sqrt{A(\lambda, z)}}{F(\lambda, z_d) \sqrt{A(\lambda, z_d)}} e^{-\mu_{t_{blood}}(\lambda)(z-z_d)} \text{ for } z > z_d, \quad (3)$$

516 where  $\frac{F(\lambda, z) \sqrt{A(\lambda, z)}}{F(\lambda, z_d) \sqrt{A(\lambda, z_d)}}$  represents the residual LCA and SDR beyond the depth  $z_d$ . We  
 517 determined  $z_d$  by automatically finding the maximum signal intensity and the starting  
 518 depth of decay inside the vessel lumen. SDA-lines (Fig. S5) from a vein are representative  
 519 of the multilayered features described by Eqs. 2 and 3. To reduce noise variation from  
 520 speckle and background, we calculated  $I'(\lambda, z_d)$  by depth-averaging the SDA-line across a  
 521 6- $\mu m$  region centered at  $z_d$ . We normalized  $I(\lambda, z)$  by  $I'(\lambda, z_d)$  to yield

$$522 \quad I(\lambda, z) = \frac{F(\lambda, z) \sqrt{A(\lambda, z)}}{F(\lambda, z_d) \sqrt{A(\lambda, z_d)}} e^{-\mu_{t_{blood}}(\lambda)(z-z_d)} \text{ for } z > z_d. \quad (4)$$

523 We rejected all vessels from depths greater than 800  $\mu m$  from the zero-delay. We  
 524 calculated  $\frac{F(\lambda, z)}{F(\lambda, z_d)}$  from the roll-offs of our spectrometer up to 65  $\mu m$  into the vessel and  
 525 found the SDR had negligible spectral influence after normalization by  $I'(\lambda, z_d)$ . Therefore,  
 526 the ratio  $\frac{F(\lambda, z)}{F(\lambda, z_d)}$  is set to 1, yielding

$$527 \quad I(\lambda, z) = \frac{\sqrt{A(\lambda, z)}}{\sqrt{A(\lambda, z_d)}} e^{-\mu_{t_{blood}}(\lambda)(z-z_d)} \text{ for } z > z_d. \quad (5)$$

528 We estimated  $\frac{\sqrt{A(\lambda, z)}}{\sqrt{A(\lambda, z_d)}}$  for the same depths (see **Supplementary Materials – Accounting**  
 529 **for LCA**) and concluded that the residual LCA could have a small, but a non-negligible  
 530 influence on sO<sub>2</sub> even after normalization by  $I'(\lambda, z_d)$ . We, therefore, included  $\frac{\sqrt{A(\lambda, z)}}{\sqrt{A(\lambda, z_d)}}$  in  
 531 our model. Finally, taking the natural logarithm of  $I(\lambda, z)$ , we have a function that is  
 532 linearly proportional to  $\mu_{t_{blood}}(\lambda)$  (Fig. 2, Step 3) as

533 
$$\ln(I(\lambda, z)) = \frac{1}{2} \ln(A(\lambda, z)) - \ln(A(\lambda, z_d)) - \mu_{t_{blood}}(\lambda)(z - z_d) \text{ for } z > z_d. \quad (6).$$

534

### 535 **Coarse data filtering**

536 We averaged NL-SDA-lines along a 32  $\mu\text{m}$  depth region beyond  $z_n$  for each respective B-  
537 scan to obtain a 1-dimensional (1D) STFT spectrum. We calculated sO<sub>2</sub> and spectral fit R<sup>2</sup>  
538 from NL-SDA-lines in each B-scan by least-squares fit (see **Methods – Oximetry fitting**  
539 **model**). Then, we applied a threshold of sO<sub>2</sub> > 15% and R<sup>2</sup> > 0.40 for 1D spectra extracted  
540 from each B-scan and removed B-scans that did not pass. We averaged the NL-SDA-lines  
541 across all passing B-scans to further reduce noise. For the smallest analyzed vessels  
542 (diameter  $\leq 60 \mu\text{m}$ ), we did not perform coarse data filtering, since averaging fewer pixels  
543 often made the spectroscopic signals too noisy for analysis in individual B-scans. Instead,  
544 we directly averaged these B-scans.

545

### 546 **Depth averaging**

547 To remove noise variations in the speckle and the background, we averaged Eq. 6 across  
548  $z$ , which can be written as

549 
$$\frac{1}{\Delta z} \int_{z_0}^{z_0 + \Delta z} \ln(I(\lambda, z)) dz$$

550 
$$= \frac{1}{\Delta z} \int_{z_0}^{z_0 + \Delta z} \frac{1}{2} (\ln(A(\lambda, z) - A(\lambda, z_d)) - \mu_{t_{blood}}(\lambda)(z - z_d)) dz \text{ for } z$$

551 
$$> z_d$$

552 
$$= LCA_{avg}(\lambda, z) - \mu_{t_{blood}}(\lambda) \left[ (z_0 - z_d) + \frac{\Delta z}{2} \right] \text{ for } z > z_d, \quad (7)$$

553 where  $LCA_{avg}$  is the depth-averaged residual LCA;  $z_0$  is the starting depth for averaging;  
554 and  $\Delta z$  is the depth range for averaging. The result of Eq. 7 is a linear combination of the  
555  $LCA_{avg}$  and  $\mu_{t_{blood}}(\lambda)$ .  $LCA_{avg}$  is depicted in Fig. S4 in **Supplementary Materials**.

556

### 557 **Depth selection**

558 Assuming  $\mu_{t_{blood}}(\lambda) \left[ (z_0 - z_d) + \frac{\Delta z}{2} \right]$  is the dominant form of spectral contrast in Eq. 7  
559 (see **Supplementary Materials – Accounting for LCA**), in the ideal case, the spectral  
560 shape of the measured STFT spectrum should not change with depth. However, we  
561 observed that the measured STFT spectral shape occasionally changed with depth. To  
562 minimize these effects, we elected to analyze  $z_0$  and  $\Delta z$  where the measured STFT  
563 spectrum changed the least in response to perturbations in depth. To assess this condition,  
564 we developed the spectral stability matrix (SSM).

565 First, we measured the STFT spectrum in a blood vessel according to Eq. 7. We  
566 iterated  $z_0$  from 0 to 12  $\mu m$  and  $\Delta z$  from 17 to 40  $\mu m$ , both in 1.15  $\mu m$  (depth pixel size)  
567 increments. We normalized each spectrum to a minimum of 0 and a maximum of 1. Then,  
568 we generated a 3-dimensional (3D) matrix that indexed the spectra according to their  
569 respective depth windows. Such a matrix can be written as

$$570 \quad S(\lambda_k)_{m,n} = \begin{pmatrix} S(\lambda_k)_{1,1} & \cdots & S(\lambda_k)_{1,20} \\ \vdots & \ddots & \vdots \\ S(\lambda_k)_{10,1} & \cdots & S(\lambda_k)_{1,20} \end{pmatrix}, \quad (8)$$

571 where  $S(\lambda_k)_{m,n}$  is the normalized (between 0 and 1) spectrum for each window iteration;  
572  $m$  is the iteration index of  $z_0$ ;  $n$  is the iteration index of  $\Delta z$ ; and  $k$  is the STFT sub-band  
573 index. To measure the response of  $S(\lambda_k)_{m,n}$  to a depth perturbation, we computed the  
574 mean-squared-error (MSE) between spectra from 9 adjacent windows in  $S(\lambda_k)_{m,n}$  to  
575 generate the SSM as

$$576 \quad SSM_{i,j} = \sum_{k=1}^{21} \sum_{x=-1}^1 \sum_{y=-1}^1 \sum_{m=2}^9 \sum_{n=2}^{19} (MSE[S(\lambda_k)_{m,n}, S(\lambda_k)_{m+x,n+y}]), \quad (9)$$

577 where  $MSE[S(\lambda_k)_{m,n}, S(\lambda_k)_{m+x,n+y}]$  is the MSE between spectra  $S(\lambda_k)_{m,n}$  and  
578  $S(\lambda_k)_{m+x,n+y}$ ; and  $x$  and  $y$  are the indexes of the compared spectra. We show an example  
579  $SSM_{m,n}$  from two selected vessels in Fig. 4. We identified the indexes  $m$  and  $n$  where  
580  $SSM_{m,n}$  was minimal the corresponding  $z_0$  and  $\Delta z$ . We used this depth window (e.g., green  
581 boxes in Figs. 4a and 4b) for sO<sub>2</sub> calculation.

582

### 583 **Oximetry fitting model**

584 To extract sO<sub>2</sub>, we fit the spectrum determined by Eq. 7 and the SSM to the following  
585 model using a non-negative linear least-squares regression

586 
$$LCA_{avg}(\lambda, z) - \left( sO_2(\mu_{a_{HbO_2}}(\lambda) + W\mu_{s_{HbO_2}}(\lambda)) + (1 - sO_2)(\mu_{a_{Hb}}(\lambda) + \right.$$

587 
$$\left. W\mu_{s_{Hb}}(\lambda)) \right) \left[ (z_0 - z_d) + \frac{\Delta z}{2} \right] \text{ for } z > z_d, (8)$$

588 where  $\mu_{a_{HbO_2}}(\lambda)$ ,  $\mu_{s_{HbO_2}}(\lambda)$ ,  $\mu_{a_{Hb}}(\lambda)$ , and  $\mu_{s_{Hb}}(\lambda)$  are the reported absorption and  
589 scattering coefficients of oxygenated and deoxygenated blood, respectively.  $W$  is the  
590 scattering scaling factor, which scales the above scattering coefficients (17). We computed  
591 the fitting for  $0.02 \leq W \leq 0.10$  (see **Supplementary Materials — Ex vivo phantom**  
592 **verification and comparison**).

593 The contribution of  $LCA_{avg}(\lambda, z)$  in Eq. 8 was estimated using optical simulation  
594 and fit the measured spectrum (see **Supplementary Materials – Accounting for LCA**).  
595 We accepted the  $LCA_{avg}(\lambda, z)$  and  $sO_2$  value that generated the highest spectral  $R^2$  fit.

596 We used the reported absorption and Mie-theory-predicted scattering coefficients  
597 of blood (14, 23). We modified the reported spectra to match the post-processing of the  
598 vis-OCT signal. First, we cropped wavelengths from the reported spectra within our  
599 spectrometer's wavelength range (508 nm – 614 nm). We upsampled the reported spectra  
600 by 6-fold to a 12288 element array, which is the same size as our interference fringe after  
601 6-fold zero-padding. Then, we performed interpolation of the reported spectra to be linear  
602 in  $k$ -space, matching the interference fringe's interpolation. Finally, we filtered and  
603 digitized the reported blood spectra with the same 21 STFT Gaussian windows.

604

### 605 **Parameter iterations**

606 We recognized that  $sO_2$  measurements might be susceptible to minute experimental or  
607 physiological variations. We perturbed  $sO_2$  measurements by introducing minor variations  
608 in three parameters we identified as sensitive to  $sO_2$  accuracy. The first parameter is  $z_d$ ,  
609 the identified depth where blood signal begins to decay. After STFT, the axial resolution  
610 of  $\sim 9 \mu m$  and spatial averaging between B-scans broadens the peak blood backscattering  
611 signal, adding uncertainty to its localization. Furthermore, random or unknown parameters,  
612 such as speckle noise, erythrocyte spatial distributions, and vis-OCT illumination beam's  
613 incidence angle, may contribute to depth-dependent spectroscopic signal differences in

614 vessels. Therefore, we tuned  $z_d$  from  $6 \mu m$  to  $14 \mu m$  in 8 equidistant steps below the  
615 identified peak blood signal and computed  $sO_2$  for each iteration. If a single peak could not  
616 be found, perhaps due to noise or spatial averaging, we then tuned  $z_d$  from  $16 \mu m$  to  $24$   
617  $\mu m$  in 8 equidistant steps from the peak amplitude of the anterior vessel wall, which is the  
618 typical range where a maximum was visible. The second parameter is the scattering scaling  
619 factor  $W$ , which can vary with erythrocyte spatial distributions and multiple scatterings.  
620 Based on *ex-vivo* bovine blood  $sO_2$  measurements (**Supplementary Materials**) and human  
621 retinal  $sO_2$  measurements, we determined that the strongest regression fits ( $R^2$ ) were found  
622 between  $W = 0.02$  and  $W = 0.10$ . Therefore, we computed 8 iterations of  $sO_2$  for  $W$  in  
623 this range with a step size of 0.01. The third parameter  $S$  scales the SDBG amplitude by a  
624 small value. Briefly, we measured the SDBG where the vis-OCT signal was attenuated to  
625 the noise floor and extrapolated its amplitude at the vessel location by fitting an exponential  
626 curve to the SDBG. Due to the low SNR of the measured spectrum relative to the SDBG,  
627 small errors in this extrapolation could alter the measured spectrum. To account for these  
628 potential errors, we applied a small correction factor  $S$  to the SDBG as  $SB(\lambda, z)$  before  
629 SDBG subtraction from Eq. 1. We tuned  $S$  between 0.96 and 1.04 in 9 steps with a step  
630 size of 0.01. We measured  $sO_2$  for each iteration (Fig. 2, Step 8). In total, we calculated  
631  $sO_2$  for  $8 \times 8 \times 9 = 576$  iterations. We stored measured  $sO_2$  and spectral fit  $R^2$  for each  
632 parameter iteration in 3D matrixes.

633

### 634 **Fine data filtering**

635 To select and remove noise and outliers, we filtered this dataset. First, we rejected all  $sO_2$   
636 iterations where the spectral fit  $R^2 < 0.80$ . We found that noisier arterial spectra resulted  
637 in  $sO_2 = 100\%$ , or saturation at the maximum possible value. Therefore, we applied  
638 stricter rejection criteria for calculations of  $sO_2 = 100\%$  and rejected all iterations where  
639  $R^2$  was less than 0.93. Following the data filtering step, we sorted the iterations in  
640 ascending order of  $sO_2$  and selected the 20 central indexes, acting as a pseudo-median  
641 measurement. Among these values, we selected the iteration where the  $R^2$  was the highest.  
642 We saved the  $z_n$ ,  $W$ , and  $A_C$  for the selected iteration and accepted the  $sO_2$  with these  
643 parameters.

644

## 645 **Vis-OCT systems**

646 We used vis-OCT systems at NYU Langone Health Center (Aurora X1, Opticent Health,  
647 Evanston, IL) and Northwestern Medical Hospital (Laboratory Prototype), which were  
648 reported, respectively, in our previous work (32). Both systems were fiber-based  
649 Michelson interferometers with 30:70 sample to reference splitting ratios. Both systems  
650 used telescopic optics in the sample arm, reaching an estimated  $7\text{-}\mu\text{m}$  ( $1/e^2$ ) spot sizes on  
651 the retina. The system roll-off is - 4.8 dB/mm in both systems.

652

## 653 **Imaging protocols**

654 Imaging was performed at NYU Langone Health Center and Northwestern Memorial  
655 Hospital. We limited light exposure on the cornea to  $< 250 \mu\text{W}$ , which is considered eye-  
656 safe (53). The camera line period was set to  $40 \mu\text{s}$  ( $39 \mu\text{s}$  exposure +  $1 \mu\text{s}$  data transfer),  
657 or a 25 kHz A-line rate. All volunteers provided informed consent before being imaged.  
658 All imaging was approved by respective NYU and Northwestern University Institutional  
659 Review Boards adhered to the Tenants of Helsinki. Volunteers had the right to cease  
660 imaging without explanation at any stage during imaging.

661 We performed three scan types for oximetry measurement: (1) arc scan, (2) small  
662 FOV raster scan, and (3) large FOV raster scan. An arc scan is a 120-degree segment of a  
663 circular scan with a radius of 1.7 mm acquired with 16 B-scans at 8192 A-lines per B-scan.  
664 A small-FOV scan is a  $1 \text{ mm} \times 1 \text{ mm}$  raster scan acquired containing 16 B-scans with 8192  
665 A-lines per B-scan. A large-FOV scan is a  $4.8 \text{ mm} \times 4.8 \text{ mm}$  raster scan containing 64 B-  
666 scans with 4096 A-lines per B-scan. The large-FOV scan was used for the *en-face* oximetry  
667 map of the optic disk (Fig. 4). We acquired arc and small-FOV scans in 5s. We acquired  
668 the large-FOV scan in 10s. We found no significant differences in  $\text{sO}_2$  values for different  
669 scanning modes.

670

## 671 **Vessel selection**

672 We measured  $\text{sO}_2$  in 176 total retinal vessels (98 arteries and 78 veins) across 18 healthy  
673 subjects. We analyzed 125 unique retinal vessels (72 arteries and 53 veins) (see **Methods**  
674 – **Retinal oximetry in a healthy cohort**). For vessels with more than one measurement,



675 we selected unique vessels by selecting sO<sub>2</sub> measurement with the highest R<sup>2</sup>. For  
676 repeatability analysis, we selected vessels with at least two repetitions.

677

### 678 **Vessel segmentation**

679 We selected the left and right borders of a vessel, guided by its attenuation shadow. To  
680 account for different vessel geometries, we automatically segmented the central 36%, 40%,  
681 and 42% of A-lines of the vessel. We repeated these three segmentations for a 4% shift left  
682 and right of the detected vessel center, totaling 9 segmentations of the same vessels. We  
683 treated each of the 9 segmentations as separate B-scans in the analysis.

684

### 685 **Statistical analysis**

686 To assess whether the lower sO<sub>2</sub> values were influenced by vessel diameter or were an  
687 artifact of poor fitting (lower R<sup>2</sup>), we included both parameters in a linear model

$$688 \quad sO_2 = a_1 D + a_2 R^2, \quad (10)$$

689 where  $D$  is vessel diameter;  $R^2$  is the spectral fit R<sup>2</sup> value; and  $a_1$  and  $a_2$  are arbitrary  
690 constants. We did not include the influence of  $W$  in the above model because we found  
691 that it had no significant correlation with vessel diameter,  $R^2$ , or sO<sub>2</sub>. A two-way ANOVA  
692 was performed in MATLAB 2018a. Significance was considered as  $p < 0.05$ . We  
693 compared sO<sub>2</sub> measurement populations in Figs. 6b and 6c. We used the two-sample t-test  
694 to determine differences in the mean. Significance was considered as  $p < 0.05$ . t-tests were  
695 performed in MATLAB 2018a.

696

### 697 **Acknowledgment**

698 The authors thank Robert Linsenmeier for fruitful discussions and the blood-gas analyzer  
699 used in this work. The authors are grateful for the generous support from the National  
700 Institutes of Health (R01EY019949, R01EY026078, R01EY028304, R01EY029121,  
701 R44EY026466, and T32EY25202).

### 702 **Disclosure**

703 HFZ, RVK, and YW have financial interests in Opticent Health

704

705 **Figures**

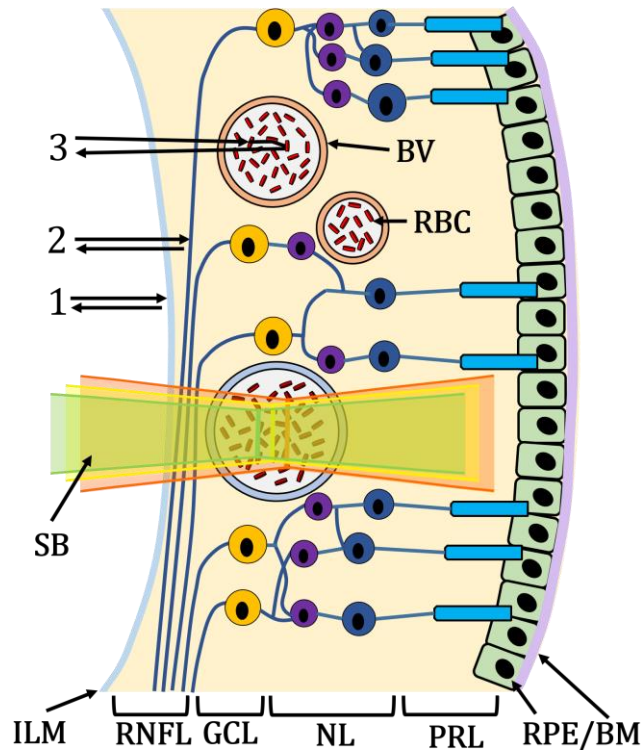

706

707 **Figure 1.** Simplified illustration of the human retina composed of inner-limiting-membrane (ILM), Retinal  
708 Nerve Fiber Layer (RNFL), blood vessels (BV; red is the artery, blue is vein), red blood cells (RBC), ganglion  
709 cell layer (GCL), nuclear layers (NL) representing the outer nuclear layer to the outer nuclear layer,  
710 photoreceptor layers (PRL) containing rods and cones, and the retinal pigment epithelium and Bruch's  
711 membrane (RPE/BM). Number 1 highlights the photon path of a specular reflection, 2 highlights the photon  
712 path of backscattering without blood attenuation, 3 highlights the photon path of backscattering with blood  
713 attenuation. A scanning beam (SB) is composed of visible-light wavelengths (green, yellow, and red illustrate  
714 different spectral bands of the beam).

715

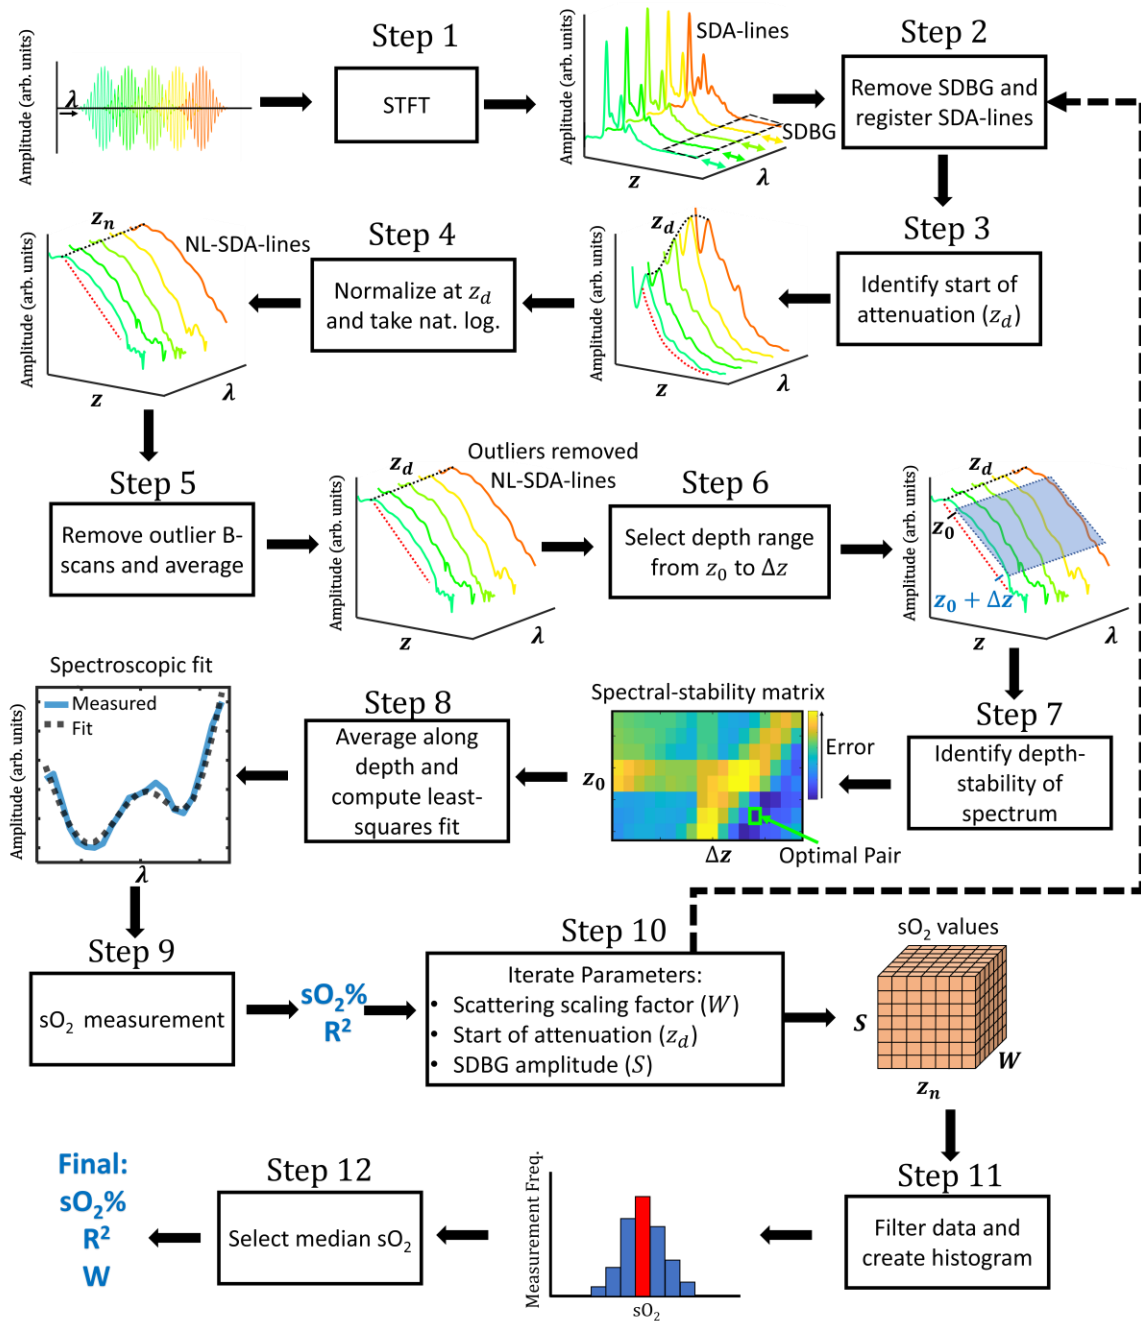

716

717 **Figure 2.** Flow chart overview of Ads-vis-OCT processing for retinal oximetry. Arrow direction highlights  
 718 the input and output of each step.

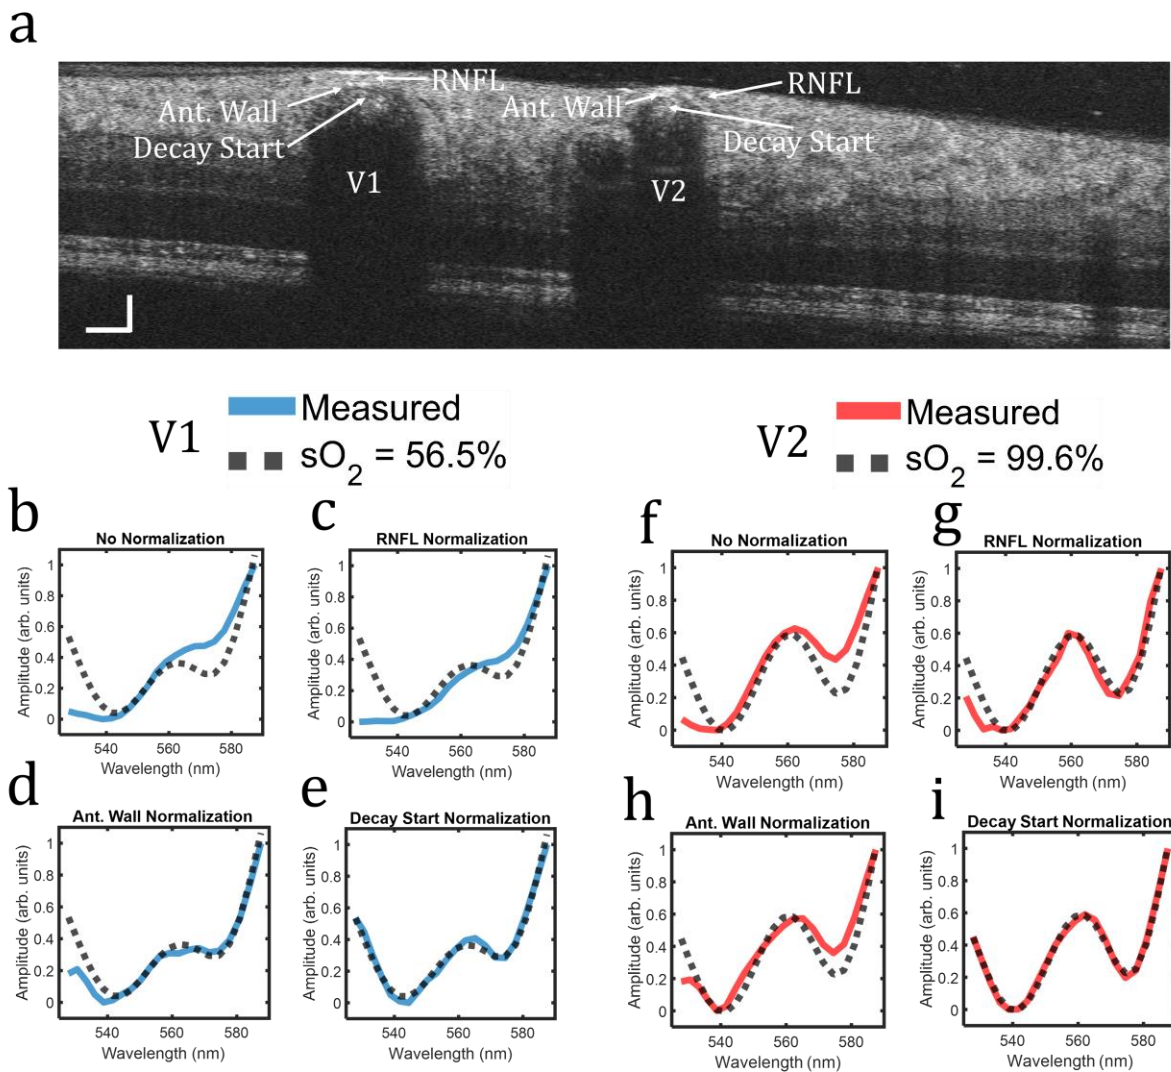

719

720 **Figure 3.** Spectroscopic normalizations in the human retina. (a) vis-OCT B-scan. Vessels labeled V1 and V2

721 were identified as vein and artery, respectively. Arrows highlight anatomical features used for normalization.

722 (b-e) Measured spectrum (blue line) and best-fit spectrum for  $sO_2 = 56.5\%$  (back dashed line) in V1 for no

723 normalization, normalization by the RNFL, normalization by the anterior vessel wall, and normalization by

724 the start of signal decay in blood, respectively. (f-i) The same analysis for the panels b-e is replicated for V2.

725

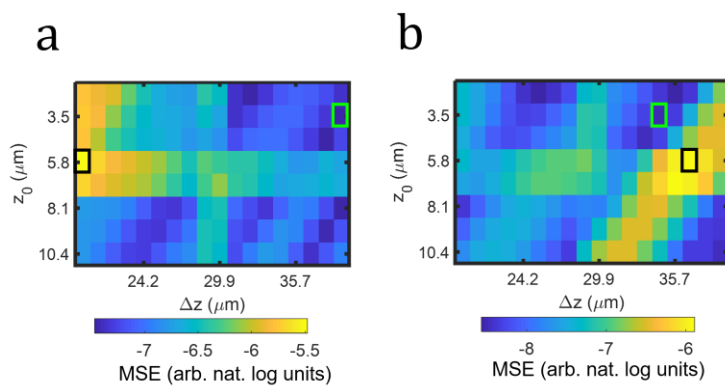

726

727 **Figure 4.** SSM for (a) V1 and (b) V2 in Fig. 3. The green box highlights the lowest MSE and the black box

728 highlights the highest MSE.

729

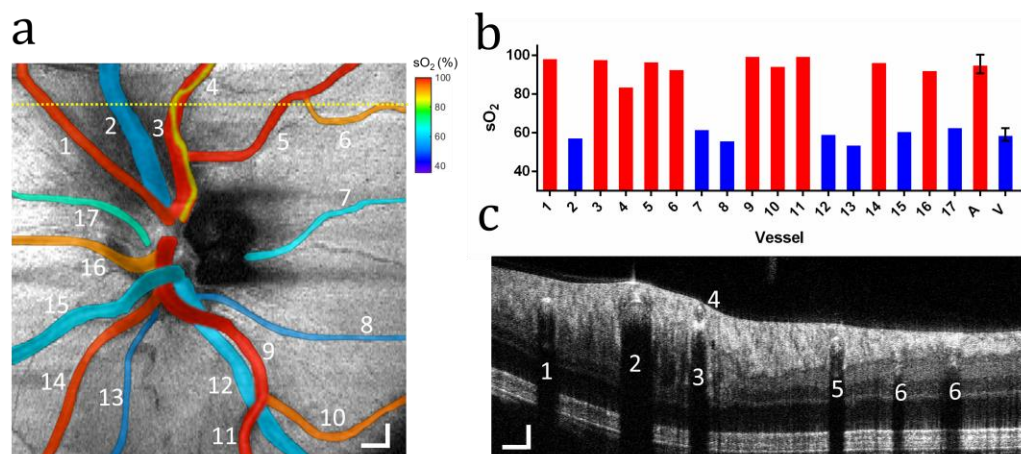

730

731 **Figure 5.** Oximetry map of the optic disk. (a) sO<sub>2</sub> measurements in 17 vessels in the optic disk from a healthy  
732 23-year-old volunteer. The sO<sub>2</sub> values pseudo-colored and overlaid onto the fundus image. Scale bar: 300  
733 μm; (b) Bar chart plots sO<sub>2</sub> measurements from the panel a in individual arteries (red bar) and veins (blue)  
734 numbered from 1 to 17, as well as average sO<sub>2</sub> in all arteries (A) and all veins (V); (c) B-scan from the  
735 position highlighted by the yellow dashed line in panel a. Scale bars: 150 μm.

736

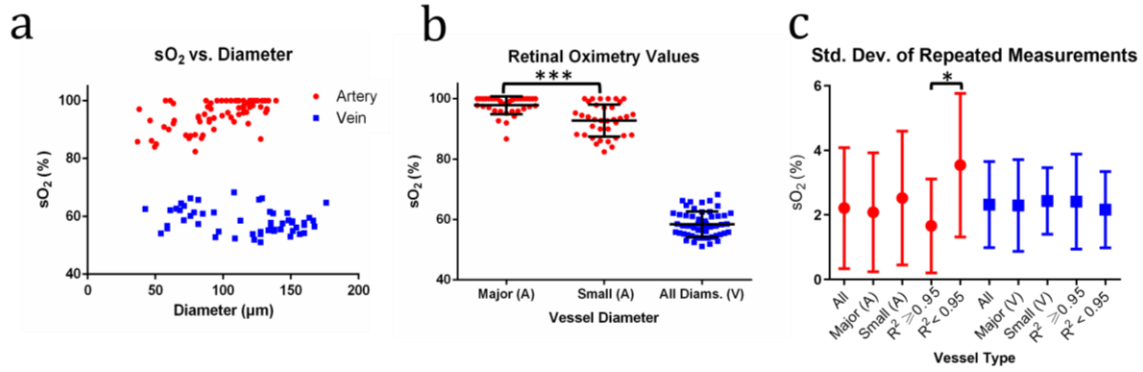

737

738 **Figure 6.** Retinal sO<sub>2</sub> in a healthy cohort. (a) sO<sub>2</sub> measurements in 72 unique arteries (red) and 53 unique  
739 veins (blue) plotted against vessel diameter from 18 healthy volunteers; (b) Distribution of sO<sub>2</sub> measurements  
740 for major (diameter  $\geq 100 \mu m$ ) and small (diameter  $< 100 \mu m$ ) artery calibers and all veins; (c)  
741 Repeatability of arteries and veins. \* indicates  $p < 0.05$  and \*\*\* indicates  $p < 0.001$  from two-sample t-test.  
742

| Subj. | Avg. Pulse Ox. sO <sub>2</sub> (%) | Avg. vis-OCT sO <sub>2</sub> (%) | Num. Unique Major Arteries Measured by vis-OCT | RMSE Between Pulse Ox. and Unique Artery sO <sub>2</sub> (%) |
|-------|------------------------------------|----------------------------------|------------------------------------------------|--------------------------------------------------------------|
| 1     | 100                                | 100                              | 2                                              | 0                                                            |
| 2     | 98                                 | 99.6                             | 2                                              | 1.61                                                         |
| 3     | 99.7                               | 98.9                             | 3                                              | 1.99                                                         |
| 4     | 99                                 | 95.2                             | 1                                              | 3.8                                                          |
| 5     | 95                                 | 95.8                             | 1                                              | 0.8                                                          |
| 6     | 98                                 | 100                              | 1                                              | 2                                                            |
| 7     | 99                                 | 100                              | 1                                              | 1                                                            |
| 8     | 100                                | 98                               | 2                                              | 2.83                                                         |
| 9     | 98                                 | 100                              | 2                                              | 2                                                            |
| 10    | 100                                | 96                               | 2                                              | 4                                                            |
| 14    | 98                                 | 97.6                             | 5                                              | 2.59                                                         |
| 17    | 99                                 | 99                               | 3                                              | 1.38                                                         |
| Avg.  | 98.6                               | 98.3                             | 2.1                                            | 2.04                                                         |

743

744 **Table 1.** Vis-OCT retinal oximetry comparison with the pulse oximeter readings. RMSE indicates root-  
745 mean-squared error between unique major arteries in each subject and respective pulse oximeter readings.

746



|                             | <b>Depth Avg. (A)</b> | <b>Slope (A)</b> | <b>Depth Avg. (V)</b> | <b>Slope (V)</b> |
|-----------------------------|-----------------------|------------------|-----------------------|------------------|
| Success %                   | 100 (n = 72)          | 64 (n = 46)      | 100 (n = 53)          | 66 (n = 35)      |
| Average sO <sub>2</sub> (%) | 95.1                  | 90.4             | 58.5                  | 56.8             |
| SD sO <sub>2</sub> (%)      | 5.1                   | 8.92             | 4.3                   | 10.71            |
| Average Fit R <sup>2</sup>  | 0.95                  | 0.92             | 0.94                  | 0.92             |

747

748 **Table 2.** Comparison of depth-averaging and slope methods for vis-OCT retinal oximetry. (A) indicates  
749 artery and (V) indicates vein.

750

## 751 **Supplementary information**

### 752 ***Ex vivo* phantom verification and comparison**

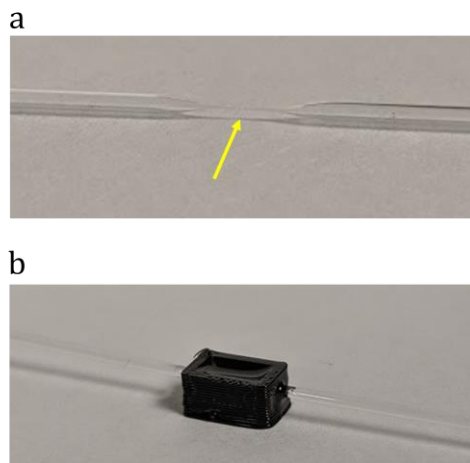

753

754 **Figure S1.** Capillary tube phantom for *ex-vivo* vis-OCT oximetry. (a) Glass capillary tube  
755 pulled to an inner diameter of  $\sim 200 \mu\text{m}$  (arrow); (b) Tube inserted in a homemade well  
756 under  $\sim 500 \mu\text{m}$  of immersion oil.

757

758 We measured  $\text{sO}_2$  values in an *ex vivo* bovine blood phantom using vis-OCT and compared  
759 them with a blood-gas analyzer (Rapidlab 248, Siemens Healthcare Diagnostics, Malvern,  
760 PA). Briefly, we pulled a glass capillary tube to an inner diameter of  $\sim 200 \mu\text{m}$  (Fig. S1a).  
761 We embedded the pulled tube in the middle of a homemade plastic well (Fig. S1b). To  
762 reduce specular reflections from the air-glass interface, we added immersion oil (refractive  
763 index = 1.52) to the well until the tube was covered by  $\sim 500 \mu\text{m}$  of oil.

764 Next, we prepared oxygenated ( $\text{sO}_2 \approx 100\%$ ) and deoxygenated ( $\text{sO}_2 \approx 0\%$ ) bovine  
765 blood (Quadfive, Ryegate, MT). Hematocrit of blood samples was 45%. To oxygenate  
766 blood, we exposed it to a constant stream of oxygen while mixing with a magnetic stir bar.  
767 We verified that the blood was oxygenated using the blood-gas machine. To deoxygenate  
768 blood, we added sodium dithionite to the solution (54). We monitored the partial pressure  
769 of oxygen ( $\text{pO}_2$ ), partial pressure of carbon dioxide ( $\text{pCO}_2$ ), pH, and temperature of the  
770 mixture using the blood-gas machine and converted to  $\text{sO}_2$  (55). We continued adding  
771 sodium dithionite and measuring  $\text{sO}_2$  until the blood was sufficiently deoxygenated.

772 Following oxygenation and deoxygenation, we immediately loaded blood samples into  
773 syringes to prevent influences from ambient air.

774 We used oxygenated and deoxygenated samples to make 17 blood samples between  
775  $sO_2 \approx 100\%$  and  $sO_2 \approx 0\%$ . To this end, we mixed oxygenated and deoxygenated samples  
776 to create blood of another oxygenation level. We measured  $sO_2$  of the mixed blood using  
777 the blood-gas machine. We imaged each blood sample immediately after blood-gas  
778 machine measurement.

779 Before loading blood into the tube, we flushed the tube with a phosphate-buffered  
780 saline (PBS) and heparin solution to prevent clotting or sedimentation. Then, we loaded  
781 the blood into a syringe, which was connected to the glass tube by  $\sim 1$  m of plastic tubing.  
782 We placed the syringe in a syringe pump, which flowed the blood at  $\sim 0.03$  mm/s inside  
783 the glass tube to prevent clotting or sedimentation.

784 Before imaging, we focused the beam on the tube by adjusting tube height and  
785 maximizing the intensity of backscattered light. After reaching best focus, we adjusted the  
786 reference arm to place the top of the tube  $< 100 \mu\text{m}$  from the zero-delay. Then, we imaged  
787 the tube using a  $512 \times 512$  raster scan. Optical power incident on the tube was 1.20 mW.  
788 After imaging each blood sample, we re-flushed the tube with the PBS and heparin solution.

789 We measured  $sO_2$  with vis-OCT in each blood sample using the AS-OCT processing  
790 proposed in this work. Since scattering factor  $W$  was not well-agreed upon in the literature,  
791 we varied  $W$  to find the highest spectral fit  $R^2$ . We found that best spectral fit  $R^2$  was  
792 reached between  $0.02 \leq W \leq 0.10$ .

793 We computed 100 vis-OCT  $sO_2$  measurements for each tube. Briefly, we processed  
794 and stored all 512 B-scans. Then, we randomly selected and averaged 50 different B-scans  
795 from this set for  $sO_2$  measurement. Then, we refreshed the 512 B-scans and repeated  
796 random selection 100 times to reach 100  $sO_2$  measurements.

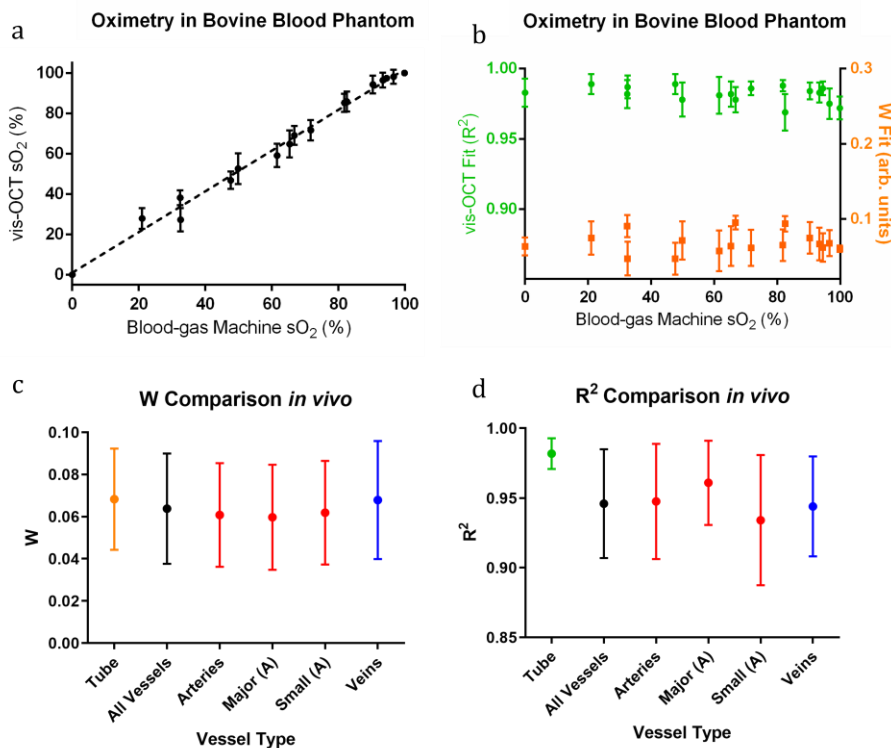

797

798

799

800

801

802

803

804

805

806

807

808

809

810

811

812

813

814

**Figure S2.** Results of vis-OCT oximetry in *ex vivo* phantom and comparison to *in vivo* human eye. (a) vis-OCT sO<sub>2</sub> measurements in phantom plotted against sO<sub>2</sub> measurements from blood-gas machine; (b) Distributions of spectral fit R<sup>2</sup> and best fit *W* in phantom; (c) Distributions of best fit *W* in phantom compared to human eye; (d) Distributions of best fit R<sup>2</sup> in phantom compared to human eye

Fig. S2a shows tube sO<sub>2</sub> measured by vis-OCT and the blood-gas machine for 17 tubes ranging from sO<sub>2</sub> ≈ 0% to sO<sub>2</sub> ≈ 100%. The equation of the best fit line is  $y = 1.01x + 1.28$  and the coefficient of regression is  $R^2 = 0.97$ . The relationship between the blood-gas machine and vis-OCT sO<sub>2</sub> was nearly a slope of 1 with only ~1% bias. This was within our target accuracy, so we did not apply a post-hoc calibration curve to vis-OCT measurements in this work.

Fig. S2b shows spectral fits (R<sup>2</sup>) and best fit *W* for each tube. Average spectral fit R<sup>2</sup> was 0.98 and average *W* was 0.068. In Fig. S2c, we plot the best-fit *W* *ex vivo* and *in vivo*. In the tubes, we measured  $W = 0.068 \pm 0.024$ . For all unique vessels, we measured  $W = 0.064 \pm 0.026$ , agreeing well with the tube data. *W* measurements were  $0.061 \pm 0.025$ ,  $0.060 \pm 0.025$ ,  $0.062 \pm 0.025$ , and  $0.068 \pm 0.028$  for all arteries, large arteries, small

815 arteries, and all veins, respectively. In Fig. S2d, we plot the spectral fit  $R^2$  *ex vivo* and *in*  
 816 *vivo*. In tubes, we measured  $R^2 = 0.98 \pm 0.01$ . For all unique vessels, we measured average  
 817  $R^2 = 0.95 \pm 0.04$ .  $R^2$  measurements were  $0.95 \pm 0.04$ ,  $0.96 \pm 0.03$ ,  $0.93 \pm 0.05$ , and  $0.94$   
 818  $\pm 0.04$  for all arteries, major (diameter  $\geq 100 \mu\text{m}$ ) arteries, small arteries (diameter  $< 100$   
 819  $\mu\text{m}$ ), and all veins, respectively. We anticipated that major arteries would have slightly  
 820 higher  $R^2$  (0.96) than smaller ones (0.93), considering the increased spatial averaging for  
 821 larger vessels. Nevertheless,  $R^2$  did not have a significant influence on  $s\text{O}_2$  value (see  
 822 **Retinal oximetry in a healthy cohort**).  
 823

| Unique Vessel | Type | Avg. Diameter ( $\mu\text{m}$ ) | Avg. $s\text{O}_2$ (%) | Repetitions | $s\text{O}_2$ Standard Deviation (%) | Avg. Spectral Fit $R^2$ |
|---------------|------|---------------------------------|------------------------|-------------|--------------------------------------|-------------------------|
| 1             | A    | 138                             | 100.0                  | 3           | 0                                    | 0.972                   |
| 2             | A    | 134                             | 98.9                   | 2           | 1.63                                 | 0.980                   |
| 3             | A    | 130                             | 100.0                  | 2           | 0                                    | 0.963                   |
| 4             | A    | 128                             | 97.1                   | 2           | 1.06                                 | 0.961                   |
| 5             | A    | 124                             | 99.6                   | 2           | 0.64                                 | 0.965                   |
| 6             | A    | 122                             | 96.2                   | 3           | 3.75                                 | 0.971                   |
| 7             | A    | 122                             | 97.8                   | 4           | 3.81                                 | 0.962                   |
| 8             | A    | 121                             | 99.2                   | 2           | 1.20                                 | 0.946                   |
| 9             | A    | 121                             | 99.9                   | 3           | 0.23                                 | 0.969                   |
| 10            | A    | 120                             | 100.0                  | 2           | 0                                    | 0.955                   |
| 11            | A    | 119                             | 95.5                   | 2           | 4.88                                 | 0.948                   |
| 12            | A    | 116                             | 99.6                   | 2           | 0.64                                 | 0.953                   |
| 13            | A    | 116                             | 98.4                   | 2           | 2.26                                 | 0.970                   |
| 14            | A    | 116                             | 98.6                   | 3           | 2.48                                 | 0.943                   |
| 15            | A    | 113                             | 97.0                   | 2           | 4.24                                 | 0.966                   |
| 16            | A    | 105                             | 96.1                   | 2           | 5.59                                 | 0.948                   |
| 17            | A    | 104                             | 97.9                   | 2           | 2.97                                 | 0.964                   |
| 18            | A    | 93                              | 92.0                   | 2           | 2.83                                 | 0.966                   |
| 19            | A    | 89                              | 99.6                   | 2           | 0.64                                 | 0.963                   |
| 20            | A    | 89                              | 96.2                   | 2           | 1.27                                 | 0.932                   |
| 21            | A    | 86                              | 91.1                   | 2           | 2.40                                 | 0.950                   |
| 22            | A    | 86                              | 92.0                   | 3           | 6.83                                 | 0.918                   |
| 23            | A    | 62                              | 92.9                   | 2           | 1.13                                 | 0.958                   |
| 24            | A    | 48                              | 91.3                   | 2           | 2.55                                 | 0.912                   |
| 25            | V    | 174                             | 62.3                   | 2           | 3.46                                 | 0.968                   |
| 26            | V    | 160                             | 57.0                   | 2           | 2.12                                 | 0.953                   |
| 27            | V    | 160                             | 58.1                   | 2           | 0.35                                 | 0.954                   |
| 28            | V    | 157                             | 54.8                   | 3           | 3.07                                 | 0.943                   |
| 29            | V    | 156                             | 60                     | 3           | 2.31                                 | 0.967                   |
| 30            | V    | 153                             | 55.4                   | 3           | 2.97                                 | 0.957                   |
| 31            | V    | 149                             | 55.9                   | 4           | 4.98                                 | 0.951                   |
| 32            | V    | 146                             | 56.0                   | 2           | 1.41                                 | 0.954                   |
| 33            | V    | 145                             | 61.0                   | 3           | 2.06                                 | 0.927                   |
| 34            | V    | 139                             | 58.4                   | 3           | 3.44                                 | 0.918                   |
| 35            | V    | 135                             | 55.0                   | 2           | 1.20                                 | 0.900                   |

|    |   |     |      |   |      |       |
|----|---|-----|------|---|------|-------|
| 36 | V | 133 | 60.1 | 2 | 1.27 | 0.974 |
| 37 | V | 131 | 54.3 | 2 | 0.49 | 0.940 |
| 38 | V | 128 | 51.5 | 2 | 4.45 | 0.955 |
| 39 | V | 125 | 50.6 | 2 | 0.78 | 0.980 |
| 40 | V | 80  | 59.0 | 2 | 2.4  | 0.977 |
| 41 | V | 70  | 64.1 | 2 | 3.46 | 0.913 |
| 42 | V | 62  | 57.7 | 2 | 1.41 | 0.904 |

824 **Table S1.** All unique vessels analyzed for repeatability in Fig. 4c. ‘A’ indicates artery and  
825 ‘V’ indicates vein.

826

## 827 Comparing depth-averaging with slope for estimation of attenuation coefficient

828

|                             | Depth Avg. (A) | Slope (A)   | Depth Avg. (V) | Slope (V)   |
|-----------------------------|----------------|-------------|----------------|-------------|
| Success %                   | 100 (n = 72)   | 64 (n = 46) | 100 (n = 53)   | 66 (n = 35) |
| Average sO <sub>2</sub> (%) | 95.1           | 90.4        | 58.5           | 56.8        |
| SD sO <sub>2</sub> (%)      | 5.1            | 8.92        | 4.3            | 10.71       |
| Average Fit R <sup>2</sup>  | 0.95           | 0.92        | 0.94           | 0.92        |

829 **Table S2.** Comparison of depth-averaging and slope methods for vis-OCT retinal  
830 oximetry

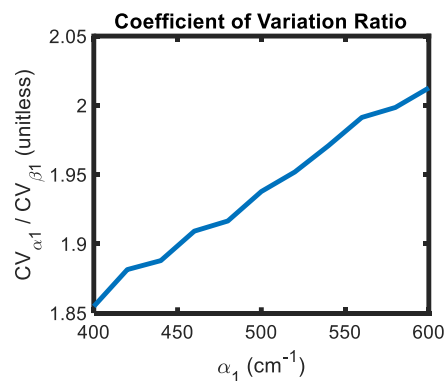

831

832 **Figure S3.** Coefficient of variation ratio between slope and depth averaging methods for  
833 estimating attenuation coefficient. Exponential decay model from Eq. S3 is used for  
834 calculations.  $\alpha_1$  is attenuation coefficient estimated by slope method;  $\beta_1$  is proportional to  
835  $\alpha_1$  and estimated by depth averaging method.

836

837 Empirically, we found that depth-averaging the natural logarithm of the SDA-lines  
838 yielded less noisy spectra, as compared with the slope method (see **Methods –**  
839 **Comparison of depth-averaging and slope methods**). We verified these empirical  
840 observations by Monte Carlo simulation. To begin, we applied the slope method and depth-

841 averaging method to the equation of a line, which is predicted by Eqn. 7 in **Methods**. (for  
842 simplification, removing small effect of LCA):

$$843 \quad y(x) = -\alpha_1 x + \sigma_N, \quad (S1)$$

844 where  $\alpha_1$  is an arbitrary constant and  $\sigma_N$  is random, normally distributed noise.  $x$  was a 30-  
845 pixel vector ranging from 0 to 35  $\mu m$  for the depth selection window. We used the slope  
846 method to compute the slope of Eq. S1 and directly find  $\alpha_1$ . We used the depth-averaging  
847 method to compute the average value of Eq. S1 (similar to Eq. 8) to find the constant  $\beta_1 \propto$   
848  $\alpha_1$ . We computed  $10^5$  iterations of such measurements, and then measured their  
849 coefficients of variation:

$$850 \quad CV_{method} = \frac{\sigma_{method}}{|\mu_{method}|}, \quad (S2)$$

851 where  $CV_{method}$  is the coefficient of variation of the measured  $\alpha_1$  or  $\beta_1$  from each  
852 respective method,  $\sigma_{method}$  is the SD of the measured  $\alpha_1$  or  $\beta_1$  from each respective  
853 method, and  $\mu_{method}$  is the average of the measured  $\alpha_1$  or  $\beta_1$  from each respective method.  
854 We computed  $CV_{method}$  for  $\alpha_1 = 400 \text{ cm}^{-1}$  to  $\alpha_1 = 600 \text{ cm}^{-1}$  in an increment of  $20 \text{ cm}^{-1}$ ,  
855 which covered the reported attenuation coefficients of blood in the visible-light spectral  
856 range for  $W = 0.064$ . We used normally distributed noise with amplitude  $\sigma_N = 0.02$  (arb.  
857 units), which was a relative noise typically observed *in vivo*. For each value of  $\alpha_1$ , we  
858 calculated  $\frac{CV_{\alpha_1}}{CV_{\beta_1}}$ , which compared the relative uncertainty of the slope method to the depth-  
859 averaging method. For all values of  $\alpha_1$ ,  $\frac{CV_{\alpha_1}}{CV_{\beta_1}}$  converged to 1.67. In general, we found that  
860 value of  $\frac{CV_{\alpha_1}}{CV_{\beta_1}}$  was independent of  $\alpha_1$  and  $\sigma_N$ . This suggested that the depth-averaging  
861 method had an intrinsic noise reduction advantage of 67% over the slope method for  
862 additive, normally distributed noise.

863 In reality, however, the SDA-lines follow an exponential decay with the additive  
864 noise. We applied a natural logarithm to this function:

$$865 \quad y_2(x) = \ln(e^{-\alpha_1 x} + \sigma_N). \quad (S3)$$

866 One frequent assumption by the slope method is that signal is significantly greater than  
867 noise, or  $e^{-\alpha_1 x} \gg \sigma_N$ , after which Eq. S3 would converge to a noiseless version of Eq. S1.  
868 However, in the human retina, SNR is often low, and this assumption might not be correct.  
869 To this end, the noise in Eq. S3 after the natural logarithm is less trivial than in Eq. S1 since

870 there is no longer a linear relationship between  $\alpha_1$  and  $\sigma_N$ . We repeated the simulation  
 871 described above, except we generated the signal and noise using Eq. S3. Fig. S3 plots  $\frac{CV_{\alpha_1}}{CV_{\beta_1}}$   
 872 for this simulation. Like the analysis from Eq. S1, the coefficient of variation using the  
 873 slope method is always higher than that using the depth averaging method. However, the  
 874  $\frac{CV_{\alpha_1}}{CV_{\beta_1}}$  is not constant and increases with increased  $\alpha_1$ . This is because the relationship  
 875 between  $\alpha_1$  and  $\sigma_N$  is nonlinear in Eq. S3. This has important implications for the slope  
 876 method in  $sO_2$  calculation, since the measured blood spectrum can have different noise  
 877 levels for different wavelengths and for different depth selection windows. In this work,  
 878 we demonstrated empirically that depth averaging is statistically advantageous over the  
 879 slope method for  $sO_2$  calculation, consistent with the simulation.

880

### 881 Longitudinal Chromatic Aberration vis-OCT Retinal Oximetry

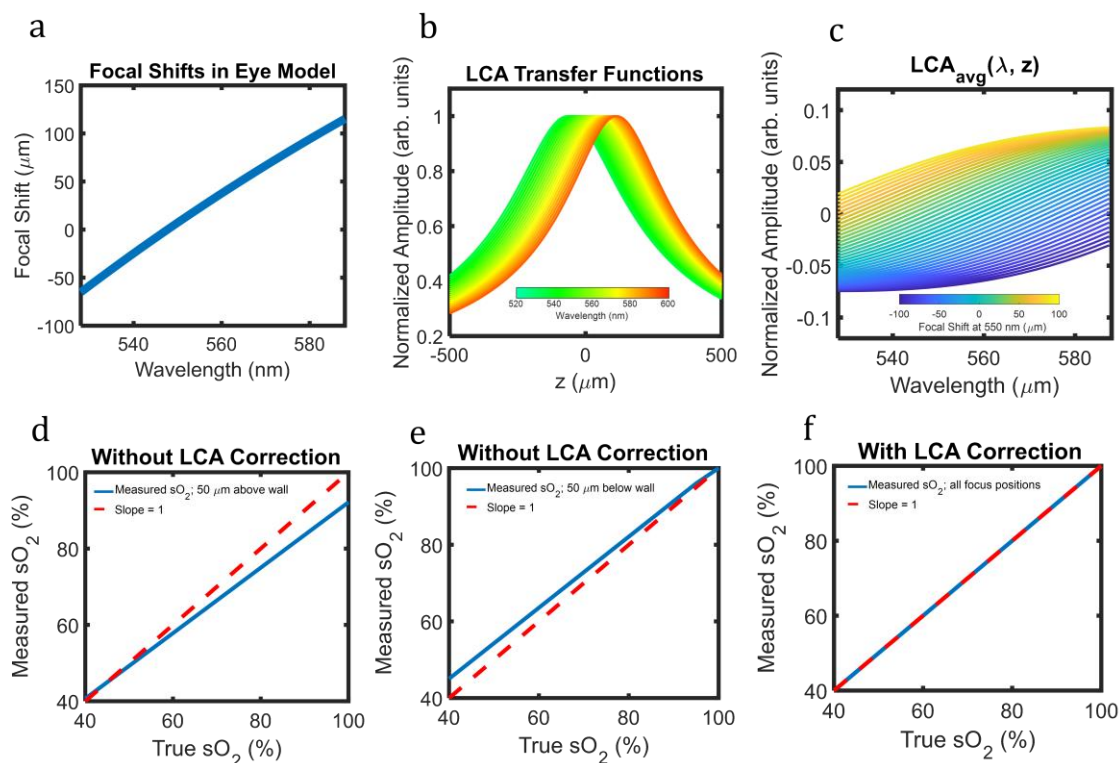

882

883 **Figure S4.** Simulation of LCA in human eye and influence on vis-OCT retinal oximetry.

884 (a) CFS in human eye simulated by Zemax software; (b) Transfer function of the LCA on

885 vis-OCT SDA-lines. Colors depict central wavelength of STFT window; (c) Simulated

886 LCA contribution to measured spectrum after AS-OCT processing; (d) Simulated  $sO_2$



887 measurement without LCA correction when focus at 550 nm is 50  $\mu\text{m}$  above the anterior  
888 vessel wall; (e) Simulated sO<sub>2</sub> measurement without LCA correction when focus at 550  
889 nm is 50  $\mu\text{m}$  below the anterior vessel wall; (f) Simulated sO<sub>2</sub> measurement with LCA  
890 correction for all focus positions  
891

892 We developed an approach for fitting LCA transfer functions to sO<sub>2</sub> measurement  
893 using the physical optics of the human eye. First, we simulated the CFS in the human eye  
894 model from Polans et al. (56) using Optic Studio 16 (Zemax, Kirkland, Washington). Since  
895 the wavelength ranges and lateral resolutions of the vis-OCT systems used in this study  
896 were approximately the same (see **Methods – Vis-OCT Systems**), we used the same CFS  
897 for both systems (Fig. S4a). The simulated chromatic focal shift (CFS) CFS is consistent  
898 with that previously measured in the human eye (57). Then, we calculated potential LCA  
899 transfer functions using a modified version of the equation used in (58) to account for  
900 spectroscopic analysis:

$$901 \quad A(\lambda, z) = \frac{1}{\left(\frac{z - z_{f_{550}} - CFS(\lambda, z)}{2z_r(\lambda)}\right)^2 + 1} \quad (\text{S4})$$

902 where  $z_{f_{550}}$  is the reference focusing depth at 550 nm,  $CFS(\lambda, z)$  are the chromatic focal  
903 shifts, and  $z_r(\lambda)$  are the wavelength-dependent Rayleigh lengths (assumed refractive index  
904 = 1.35 and  $1/e^2$  spot size = 7  $\mu\text{m}$ ). We calculated 41 LCA transfer functions up to  $z_{f_{550}} =$   
905 100  $\mu\text{m}$  above and below the anterior wall of a simulated vessel in 5  $\mu\text{m}$  increments. Fig.  
906 S4b illustrates a simulated LCA transfer function ( $\sqrt{A(\lambda, z)}$ ) for  $z_{f_{550}}$  focused at the  
907 anterior vessel wall. Then, we normalized  $\sqrt{A(\lambda, z)}$  by its spectral profile at  $z_n = 12 \mu\text{m}$   
908 into the simulated vessel lumen, consistent with typical sO<sub>2</sub> measurements, and took its  
909 natural logarithm. We found  $LCA_{avg}(\lambda, z)$  by averaging the normalized  $\ln(\sqrt{A(\lambda, z)})$   
910 from  $z_0 = 16 \mu\text{m}$  to  $z_0 + \Delta z = 46 \mu\text{m}$  into the vessel lumen (Eqn. 7), also consistent with  
911 typical sO<sub>2</sub> measurements. To create the LCA lookup table, we saved  $LCA_{avg}(\lambda, z)$  for  
912 each of the 41 focal positions (Fig. S4c).

913 To understand potential influence of LCA on sO<sub>2</sub> measurement, we simulated  
914 SDA-lines in a vessel consistent with the Beer-Lambert law and the attenuation spectra in  
915 Faber et. al (23). We multiplied  $\sqrt{A(\lambda, z)}$  at each focal position with the SDA-lines to

916 account for LCA (Eqn. 1) and took its natural logarithm. We averaged the spectrum at the  
917 same depths used to find  $LCA_{avg}(\lambda, z)$  (Eqn. 8 in **Methods**). We noted that for all  
918 simulated physiological sO<sub>2</sub> measurements (sO<sub>2</sub> = 40% to sO<sub>2</sub> = 100%) and focal positions,  
919 the peak-to-peak amplitude of  $LCA_{avg}(\lambda, z)$  was less than 0.25 times the peak-to-peak  
920 amplitude of  $\mu_{t_{blood}}(\lambda) \left[ (z_0 - z_n) + \frac{\Delta z}{2} \right]$ . We used this relationship to constrain physically  
921 reasonable  $LCA_{avg}(\lambda, z)$  to avoid overfitting this parameter in the sO<sub>2</sub> measurement.  
922 Furthermore, since the above constraint described relative amplitudes only, it was  
923 independent optical power incident on the vessel.

924 We measured sO<sub>2</sub> in the above simulation without and with LCA fitting described  
925 in **Methods – Oximetry Fitting Model**. We measured sO<sub>2</sub> for up to  $z_{f_{550}} = 100 \mu m$  above  
926 and below the anterior wall of a simulated vessel in  $5 \mu m$  increments. Measurements were  
927 derived from simulated SDA-lines of oxygen-dependent spectra from sO<sub>2</sub> = 40% to 100%.  
928 Figs. S4d and S4e plot sO<sub>2</sub> measurements without fitting the contribution of  $LCA_{avg}(\lambda, z)$ .  
929 Fig. S4d shows sO<sub>2</sub> measurements for  $z_{f_{550}} = 50 \mu m$  above the vessel anterior wall and Fig.  
930 S4e shows sO<sub>2</sub> measurements for  $z_{f_{550}} = 50 \mu m$  below the anterior wall. When  $z_{f_{550}} = 50$   
931  $\mu m$  above the anterior wall, sO<sub>2</sub> is underestimated. When  $z_{f_{550}} = 50 \mu m$  below the anterior  
932 wall, sO<sub>2</sub> is overestimated. Fig. S4f plots sO<sub>2</sub> measurements with fitting the contribution of  
933  $LCA_{avg}(\lambda, z)$ , as described in **Methods – Oximetry Fitting Model**. For all values of  $z_{f_{550}}$ ,  
934 measured sO<sub>2</sub> matches the ground truth sO<sub>2</sub> with a slope of 1.

935 We recognize this is a simplified approach may not have fully appreciated the exact  
936 influence of LCA in each recorded image. Nevertheless, such corrections are based on the  
937 well-verified aberrations and defocusing in the human eye. More precise LCA correction  
938 may be reached with a wavefront sensor and adaptive optics to directly measure  
939 wavelength-dependent aberrations, although they add expense and complexity to the vis-  
940 OCT system. The influence of LCA can also be reduced by employing an achromatizing  
941 lens (30) in the sample arm of the system. Additionally, our vis-OCT systems used a  
942 focusing beam diameter ( $1/e^2$ ) of  $7 \mu m$ . Decreasing beam diameter at the cornea and  
943 increasing depth of focus can also reduce influence of LCA on sO<sub>2</sub> calculation, although it  
944 may challenge laterally resolving smaller vessels.

945

946 **Depth-resolved spectral analysis**

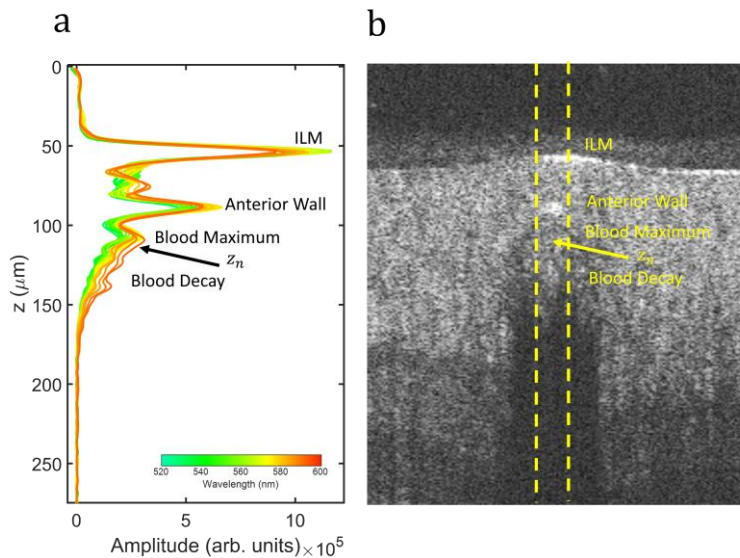

947

948 **Figure S5.** SDA-lines features. (a) SDA-lines from vein in human retina. Color bar

949 represents central wavelength of STFT window.  $z_n$  indicates depth of normalization

950 where SDA-lines start to decay in amplitude; (b) Magnified B-scan where SDA-lines in

951 (a) were measured. SDA-lines were averaged laterally within yellow dashed lines

952

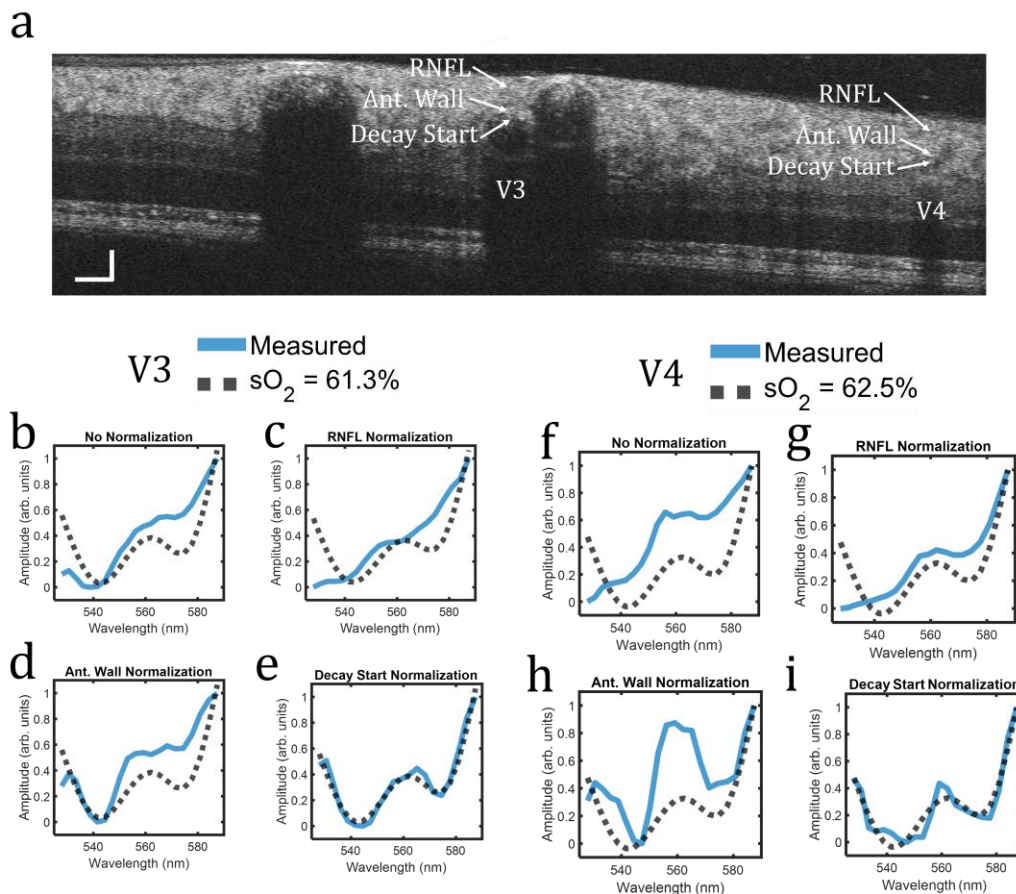

953

954 **Figure S6.** Spectroscopic normalizations in the human retina. (a) vis-OCT B-scan. Vessels labeled V3 and  
955 V4 both identified as veins. Arrows highlight anatomical features used for normalization. (b-e) Measured  
956 spectrum (blue line) and literature-derived spectrum for  $sO_2 = 61.3\%$  (back dashed line) in V3 for no  
957 normalization, normalization by the RNFL, normalization by the vessel anterior wall, and normalization by  
958 the start of signal decay in blood, respectively. (f-i) The same analysis for Fig. S6b-S6e is replicated for V4.  
959

960 Fig. S6a shows the same vis-OCT B-scan as in Fig. 3a (see **Methods**), with vessels V3 and  
961 V4, two veins, highlighted. We tested spectroscopic normalizations in V3 and V4 (Fig.  
962 S6b-S6i) in the same ways depicted in Figs. 3b-3i. Like in Figs. 3b-3i, the only  
963 normalization agreeing well with the literature is the decay start normalization, indicating  
964 removal of spectral contaminants. The other normalizations do not agree well with the  
965 literature and are not necessarily consistent across different vessels. For example, the  
966 anterior wall normalization for V3 (Fig. S6d) shows agreement between the measured and  
967 predicted spectrum only for wavelengths shorter than 540 nm. Such trend is not seen in V4  
968 (Fig. S6h), where the measured spectrum has a higher contrast “W” shape. Notably, vessels

969 V3 and V4 are smaller in diameter and buried deeper under the RNFL than vessels V1 and  
970 V2 in Fig. 3. Nevertheless, removal of spectral contaminants allows for accurate spectral  
971 measurement.

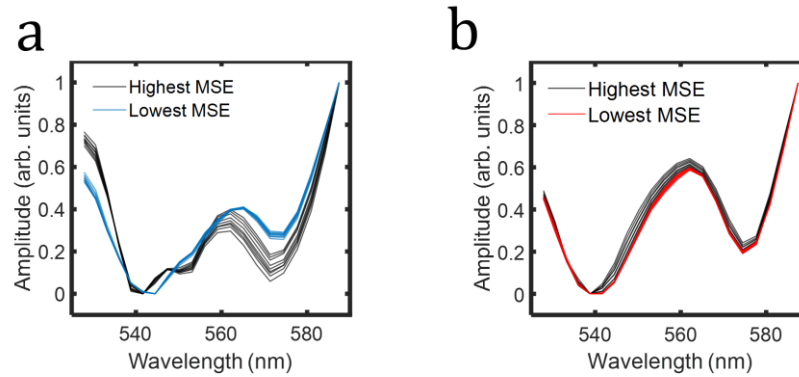

972

973 **Figure S7.** Measured STFT spectra from the highest and lowest mean-squared-error (MSE) in the spectral  
974 stability matrixes in Fig. 4. (a) Measured STFT spectra from Fig. 4a. Black lines plot nine spectra after depth  
975 perturbations for the highest MSE (black box in Fig. 4a) and blue lines plot nine spectra after depth  
976 perturbations for the lowest MSE (green box in Fig. 4a). (b) Same analysis as (a) but for the spectral stability  
977 matrix in Fig. 4b. Red lines indicate lowest MSE.

978

979

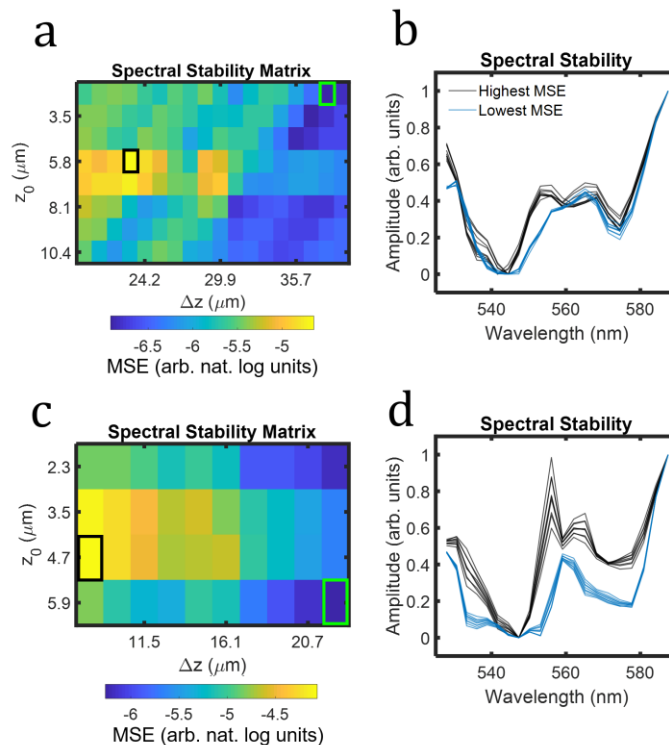

980

981 **Figure S8.** Spectral stability analysis in human retinal vessels. (a) Spectral stability matrix (SSM) for vessel  
982 V3 from Fig. S6a. Green box highlights lowest mean-squared-error (MSE) and black box highlights highest  
983 MSE; (b) Spectra in V3 after nine depth perturbations for the lowest MSE (blue lines) and highest MSE  
984 (black lines) in Fig. S8a, respectively. (c) SSM for vessel V4 from Fig. S6a. Green box highlights MSE and  
985 black box highlights highest MSE. (d) Spectra in V4 after nine depth perturbations for the lowest MSE (red  
986 lines) and highest MSE (black lines) in Fig. S8c, respectively.

987

988 Fig. S8 shows the spectral stability analysis for vessels V3 and V4 in Fig. S6a. The analysis  
989 is the same as that shown for vessels V1 and V2 in Figs. 4 & S7. The spectra selected at  
990 the lowest MSE of the SSM (Figs S8b and S8d) are stable in response to depth perturbations  
991 and are therefore consistent with the Beer-Lambert model of attenuation. We note that Fig.  
992 S8c shows a smaller depth range than Fig. S7a, which is due to the smaller profile of the  
993 vessel.

994

995

## 996 **References**

- 997 1. Y. Sun, L. E. H. Smith, Retinal Vasculature in Development and Diseases. *Annu Rev Vis Sci*  
998 **4**, 101-122 (2018).
- 999 2. J. Kur, E. A. Newman, T. Chan-Ling, Cellular and physiological mechanisms underlying  
1000 blood flow regulation in the retina and choroid in health and disease. *Prog Retin Eye Res*  
1001 **31**, 377-406 (2012).
- 1002 3. R. A. Linsenmeier, H. F. Zhang, Retinal oxygen: from animals to humans. *Prog Retin Eye*  
1003 *Res* **58**, 115-151 (2017).
- 1004 4. D. Y. Yu, S. J. Cringle, Oxygen distribution and consumption within the retina in  
1005 vascularised and avascular retinas and in animal models of retinal disease. *Prog Retin Eye*  
1006 *Res* **20**, 175-208 (2001).
- 1007 5. J. Yi *et al.*, Visible light optical coherence tomography measures retinal oxygen metabolic  
1008 response to systemic oxygenation. *Light-Sci Appl* **4** (2015).
- 1009 6. B. T. Soetikno *et al.*, Inner retinal oxygen metabolism in the 50/10 oxygen-induced  
1010 retinopathy model. *Sci Rep-Uk* **5** (2015).
- 1011 7. K. Fondi *et al.*, Retinal oxygen extraction in individuals with type 1 diabetes with no or  
1012 mild diabetic retinopathy. *Diabetologia* **60**, 1534-1540 (2017).
- 1013 8. C. M. Jorgensen, S. H. Hardarson, T. Bek, The oxygen saturation in retinal vessels from  
1014 diabetic patients depends on the severity and type of vision-threatening retinopathy.  
1015 *Acta Ophthalmol* **92**, 34-39 (2014).
- 1016 9. R. A. Linsenmeier, H. F. Zhang, Retinal oxygen: from animals to humans. *Prog Retin Eye*  
1017 *Res* **58**, 115-151 (2017).
- 1018 10. A. Shughoury *et al.*, Retinal oximetry in glaucoma: investigations and findings reviewed.  
1019 *Acta Ophthalmol* **98**, 559-571 (2020).
- 1020 11. D. Huang *et al.*, Optical Coherence Tomography. *Science* **254**, 1178-1181 (1991).

- 1021 12. N. Nassif *et al.*, In vivo human retinal imaging by ultrahigh-speed spectral domain optical  
1022 coherence tomography. *Opt Lett* **29**, 480-482 (2004).
- 1023 13. M. Wojtkowski, High-speed optical coherence tomography: basics and applications. *Appl*  
1024 *Optics* **49**, D30-D61 (2010).
- 1025 14. S. Y. Chen, J. Yi, W. Z. Liu, V. Backman, H. F. Zhang, Monte Carlo Investigation of Optical  
1026 Coherence Tomography Retinal Oximetry. *Ieee T Bio-Med Eng* **62**, 2308-2315 (2015).
- 1027 15. B. W. Yin *et al.*, Dual-wavelength photothermal optical coherence tomography for  
1028 imaging microvasculature blood oxygen saturation. *J Biomed Opt* **18** (2013).
- 1029 16. L. Kagemann *et al.*, Spectral oximetry assessed with high-speed ultra-high-resolution  
1030 optical coherence tomography. *J Biomed Opt* **12** (2007).
- 1031 17. J. Yi, Q. Wei, W. Liu, V. Backman, H. F. Zhang, Visible-light optical coherence tomography  
1032 for retinal oximetry. *Opt Lett* **38**, 1796-1798 (2013).
- 1033 18. X. Shu, L. Beckmann, H. F. Zhang, Visible-light optical coherence tomography: a review. *J*  
1034 *Biomed Opt* **22** (2017).
- 1035 19. S. P. Chong, M. Bernucci, H. Radhakrishnan, V. J. Srinivasan, Structural and functional  
1036 human retinal imaging with a fiber-based visible light OCT ophthalmoscope. *Biomed Opt*  
1037 *Express* **8**, 323-337 (2017).
- 1038 20. S. P. Chong, C. W. Merkle, C. Leahy, H. Radhakrishnan, V. J. Srinivasan, Quantitative  
1039 microvascular hemoglobin mapping using visible light spectroscopic Optical Coherence  
1040 Tomography. *Biomed Opt Express* **6**, 1429-1450 (2015).
- 1041 21. S. H. Pi *et al.*, Rodent retinal circulation organization and oxygen metabolism revealed by  
1042 visible-light optical coherence tomography. *Biomed Opt Express* **9**, 5851-5862 (2018).
- 1043 22. S. H. Pi *et al.*, Retinal capillary oximetry with visible light optical coherence tomography.  
1044 *P Natl Acad Sci USA* **117**, 11658-11666 (2020).
- 1045 23. D. J. Faber *et al.*, Oxygen saturation-dependent absorption and scattering of blood. *Phys*  
1046 *Rev Lett* **93** (2004).
- 1047 24. L. Beckmann *et al.*, Longitudinal deep-brain imaging in mouse using visible-light optical  
1048 coherence tomography through chronic microprism cranial window. *Biomed Opt Express*  
1049 **10**, 5235-5250 (2019).
- 1050 25. M. Hammer, W. Vilser, T. Riemer, D. Schweitzer, Retinal vessel oximetry-calibration,  
1051 compensation for vessel diameter and fundus pigmentation, and reproducibility. *J*  
1052 *Biomed Opt* **13** (2008).
- 1053 26. W. Song *et al.*, Visible light optical coherence tomography angiography (vis-OCTA)  
1054 facilitates local microvascular oximetry in the human retina. *Biomed Opt Express* **11**, 4037-  
1055 4051 (2020).
- 1056 27. I. Rubinoff *et al.*, Spectrally dependent roll-off in visible-light optical coherence  
1057 tomography. *Opt Lett* **45**, 2680-2683 (2020).
- 1058 28. I. Rubinoff, R. V. Kuranov, H. F. Zhang, Intrinsic spectrally-dependent background in  
1059 spectroscopic visible-light optical coherence tomography. *Biomed Opt Express* **12**, 110-  
1060 124 (2021).
- 1061 29. C. Veenstra *et al.*, Quantification of total haemoglobin concentrations in human whole  
1062 blood by spectroscopic visible-light optical coherence tomography. *Sci Rep-Uk* **9** (2019).
- 1063 30. S. P. Chong *et al.*, Ultrahigh resolution retinal imaging by visible light OCT with longitudinal  
1064 achromatization. *Biomed Opt Express* **9**, 1477-1491 (2018).
- 1065 31. E. Yuan, P. Si, Y. Winetraub, S. Shevidi, A. de la Zerda, A Spectral Demixing Model for  
1066 Triplex In Vivo Imaging of Optical Coherence Tomography Contrast Agents. *Acs Photonics*  
1067 **7**, 893-900 (2020).

- 1068 32. I. Rubinoff *et al.*, Speckle reduction in visible-light optical coherence tomography using  
1069 scan modulation. *Neurophotonics* **6** (2019).
- 1070 33. A. Kho, V. J. Srinivasan, Compensating spatially dependent dispersion in visible light OCT.  
1071 *Opt Lett* **44**, 775-778 (2019).
- 1072 34. I. Rubinoff, R. V. Kuranov, H. F. Zhang, Intrinsic spectrally-dependent background in  
1073 spectroscopic visible-light optical coherence tomography. *bioRxiv*  
1074 10.1101/2020.09.13.294876, 2020.2009.2013.294876 (2020).
- 1075 35. Y. Y. Huang *et al.*, Optical Coherence Tomography Detects Necrotic Regions and  
1076 Volumetrically Quantifies Multicellular Tumor Spheroids. *Cancer Res* **77**, 6011-6020  
1077 (2017).
- 1078 36. C. Cuartas-Vélez, C. Veenstra, S. Kruitwagen, W. Petersen, N. Bosschaart, Optical density  
1079 based quantification of total haemoglobin concentrations with spectroscopic optical  
1080 coherence tomography. *Sci Rep-Uk* **11**, 8680 (2021).
- 1081 37. J. Zhu, C. W. Merkle, M. T. Bernucci, S. P. Chong, V. J. Srinivasan, Can OCT Angiography Be  
1082 Made a Quantitative Blood Measurement Tool? *Appl Sci-Basel* **7** (2017).
- 1083 38. H. de Carvalho, R. N. Pittman, Longitudinal and radial variation of PO<sub>2</sub> in the hamster  
1084 cheek pouch microcirculation. *Faseb J* **15**, A47-A47 (2001).
- 1085 39. R. N. Pittman, Oxygen gradients in the microcirculation. *Acta Physiol* **202**, 311-322 (2011).
- 1086 40. S. Sakadzic *et al.*, Large arteriolar component of oxygen delivery implies a safe margin of  
1087 oxygen supply to cerebral tissue. *Nat Commun* **5** (2014).
- 1088 41. B. R. Duling, R. M. Berne, Longitudinal Gradients in Periarteriolar Oxygen Tension in  
1089 Hamster Cheek Pouch. *Fed Proc* **29**, A320-& (1970).
- 1090 42. M. Sharan, E. P. Vovenko, A. Vadapalli, A. S. Popel, R. N. Pittman, Experimental and  
1091 theoretical studies of oxygen gradients in rat pial microvessels. *J Cerebr Blood F Met* **28**,  
1092 1597-1604 (2008).
- 1093 43. R. N. Pittman, B. R. Duling, Effects of Altered Carbon-Dioxide Tension on Hemoglobin  
1094 Oxygenation in Hamster Cheek Pouch Microvessels. *Microvasc Res* **13**, 211-224 (1977).
- 1095 44. A. G. Tsai, P. C. Johnson, M. Intaglietta, Oxygen gradients in the microcirculation. *Physiol*  
1096 *Rev* **83**, 933-963 (2003).
- 1097 45. R. R. Liu, S. Y. Cheng, L. Tian, J. Yi, Deep spectral learning for label-free optical imaging  
1098 oximetry with uncertainty quantification. *Light-Sci Appl* **8** (2019).
- 1099 46. M. Prasse, F. G. Rauscher, P. Wiedemann, A. Reichenbach, M. Francke, Optical properties  
1100 of retinal tissue and the potential of adaptive optics to visualize retinal ganglion cells in  
1101 vivo. *Cell Tissue Res* **353**, 269-278 (2013).
- 1102 47. J. Y. Xu, G. P. Shi, Vascular wall extracellular matrix proteins and vascular diseases. *Bba-*  
1103 *Mol Basis Dis* **1842**, 2106-2119 (2014).
- 1104 48. G. M. Ni *et al.*, Towards Indicating Human Skin State In Vivo Using Geometry-Dependent  
1105 Spectroscopic Contrast Imaging. *Ieee Photonic Tech L* **32**, 697-700 (2020).
- 1106 49. X. Ge *et al.*, Geometry-Dependent Spectroscopic Contrast in Deep Tissues. *Iscience* **19**,  
1107 965-+ (2019).
- 1108 50. R. R. Liu, W. Y. Song, V. Backman, J. Yi, Quantitative quality-control metrics for in vivo  
1109 oximetry in small vessels by visible light optical coherence tomography angiography.  
1110 *Biomed Opt Express* **10**, 465-486 (2019).
- 1111 51. R. R. Liu *et al.*, Single capillary oximetry and tissue ultrastructural sensing by dual-band  
1112 dual-scan inverse spectroscopic optical coherence tomography. *Light-Sci Appl* **7** (2018).
- 1113 52. R. R. Liu *et al.*, Theoretical model for optical oximetry at the capillary level: exploring  
1114 hemoglobin oxygen saturation through backscattering of single red blood cells. *J Biomed*  
1115 *Opt* **22** (2017).



- 1116 53. J. Yi, S. Y. Chen, X. Shu, A. A. Fawzi, H. F. Zhang, Human retinal imaging using visible-light  
1117 optical coherence tomography guided by scanning laser ophthalmoscopy. *Biomed Opt*  
1118 *Express* **6**, 3701-3713 (2015).
- 1119 54. R. V. Kuranov *et al.*, Depth-resolved blood oxygen saturation measurement by dual-  
1120 wavelength photothermal (DWP) optical coherence tomography. *Biomed Opt Express* **2**,  
1121 491-504 (2011).
- 1122 55. G. R. Kelman, Digital Computer Procedure for Conversion of Pco<sub>2</sub> into Blood Co<sub>2</sub> Content.  
1123 *Resp Physiol* **3**, 111-+ (1967).
- 1124 56. J. Polans, B. Jaeken, R. P. McNabb, P. Artal, J. A. Izatt, Wide-field optical model of the  
1125 human eye with asymmetrically tilted and decentered lens that reproduces measured  
1126 ocular aberrations. *Optica* **2**, 124-134 (2015).
- 1127 57. M. Vinas *et al.*, Longitudinal Chromatic Aberration of the human eye in the visible and  
1128 near infrared from Hartmann-Shack wavefront sensing, double-pass and psychophysics.  
1129 *Invest Ophth Vis Sci* **55** (2014).
- 1130 58. D. J. Faber, F. J. van der Meer, M. C. G. Aalders, T. G. van Leeuwen, Quantitative  
1131 measurement of attenuation coefficients of weakly scattering media using optical  
1132 coherence tomography. *Opt Express* **12**, 4353-4365 (2004).
- 1133
- 1134
